# Supplementary material for: Epidemiology and Resistance Patterns of Bacterial and Fungal Colonization of Biliary Plastic Stents: A Prospective Cohort Study
Source: PLoS One. 2016 May 12;11(5):e0155479. doi: 10.1371/journal.pone.0155479 (PMC4865241; doi:10.1371/journal.pone.0155479)
Supplement: S1 Dataset — (XLSX) [file pone.0155479.s001.xlsx]

## Sheet: Tab 1
Stent Nr.	Stentart	Erreger
1	gerade	C. albicans
2	Doppel-Pigtail	E. gallinarum	E. coli	C. albicans	C. glabrata	Serratia marcescens
3	gerade	Klebsiella pneumoniae	Pseudomonas stutzeri
4	gerade	Klebsiella pneumoniae	Lactobacillus rhamnosus	Strep. Parasanguinis
5	Doppel-Pigtail	E. faecalis	E. coli
6	gerade	E. faecium	Enterobacter cloacae	E. coli
7	Doppel-Pigtail	E. faecalis	C. albicans	Klebsiella pneumoniae	E. coli
8	Doppel-Pigtail	C. albicans	C. kefyr
9	gerade	E. faecalis	Enterobacter cloacae
10	Doppel-Pigtail	E. faecium
11	gerade	Klebsiella oxytoca
12	gerade	E. hirae	E. casseliflavu	Klebsiella pneumoniae
13	Doppel-Pigtail	C. albicans	Strept. anginosus
14	Doppel-Pigtail	E. hirae
15	Doppel-Pigtail	C. albicans	Enterobacter cloacae	Trueperella bernardiae
16	Doppel-Pigtail	E. faecium	E. coli	C. albicans	C. krusei
17	Doppel-Pigtail	Klebsiella pneumoniae	E. gallinarum
18	Doppel-Pigtail	E. casseliflavu	C. albicans	C. glabrata	Klebsiella pneumoniae
19	Doppel-Pigtail	E. coli	C. albicans	Staph. haemolyticus	E. faecalis
20	gerade	E. coli	C. glabrata
21	gerade	Proteus vulgaris	Proteus mirabilis	Staph. aureus
22	gerade	E. faecium	Strept. anginosus
23	gerade	E. faecalis	C. albicans
24	gerade	E. faecium	C. albicans	C. glabrata	C. tropicalis	Microbacter flavescens
25	gerade	E. faecium	Proteus vulgaris
26	gerade	Hafnia alvei	E. faecalis
27	gerade	C. glabrata	C. tropicalis	Staph. vitulinus
28	Doppel-Pigtail	C. albicans	Klebsiella oxytoca	Yersinia pseudotuberculosis	Strep. Gallolyticus ssp. Gallolyticus
29	Doppel-Pigtail	E. faecium	C. albicans	C. glabrata
30	gerade	E. faecalis	Serratia marcescens
31	Doppel-Pigtail	E. faecalis	E. coli	C. albicans	E. casseliflavus
32	Doppel-Pigtail	C. albicans	Prevotella melaninogenica	Providencia rettgeri
33	gerade	E. coli	C. albicans	Klebsiella pneumoniae	Strept. anginosus
34	Doppel-Pigtail	E. casseliflavu	Klebsiella pneumoniae	Morganella morganii	Cryptococcus laurentii
35	Doppel-Pigtail	C. albicans	E. faecium
36	gerade	C. albicans	Klebsiella pneumoniae
37	Doppel-Pigtail	E. faecalis	E. coli	Moraxella osloensis
38	Doppel-Pigtail	E. coli	C. albicans	Strep. oralis/mitis	Hafnia alvei	Leifsonia aquatica	Strep. Gallolyticus ssp. Pasteurianus
39	gerade	E. faecalis	C. albicans	Klebsiella pneumoniae	Klebsiella oxytoca
40	gerade	E. faecium	E. coli	Escherichia hermanii	Strept. anginosus
41	gerade	E. faecium	E. casseliflavu	Corynebacterium pseudodiphteriticum
42	Doppel-Pigtail	E. coli	Strept. anginosus	Lactobacillus rhamnosus
43	gerade	E. coli	Klebsiella oxytoca	Strept. anginosus
44	gerade	E. faecalis	C. albicans	C. glabrata	Enterobacter cloacae
45	Doppel-Pigtail	E. avium	E. coli	Cryptococcus laurentii	Klebsiella pneumoniae	Morganella morganii	Actinomyces odontolyticus
46	gerade	E. faecalis	E. coli	Enterobacter cloacae	Propionibacterium propionium
47	Doppel-Pigtail	E. faecalis	Enterobacter cloacae	Strept. anginosus	Hafnia alvei
48	Doppel-Pigtail	E. coli	C. albicans	Strept. anginosus	Strept. constellatus	Actinomyces odontolyticus
49	Doppel-Pigtail	E. avium	E. coli	C. albicans	Proteus vulgaris	Raoultella planticola
50	gerade	E. faecalis	E. coli
51	Doppel-Pigtail	E. faecium	E. coli	C. albicans
52	Doppel-Pigtail	E. coli	C. albicans	Strept. constellatus
53	Doppel-Pigtail	E. faecium	E. gallinarum	C. albicans
54	Doppel-Pigtail	E. faecalis	E. coli	C. albicans	C. parapsilosis	Citrobacter freundii
55	Doppel-Pigtail	E. faecalis	C. albicans	Prevotella melaninogenica
56	Doppel-Pigtail	E. faecium	E. casseliflavu	E. coli	C. albicans	Klebsiella oxytoca
57	Doppel-Pigtail	E. faecium	E. coli	C. albicans	Enterobacter cloacae	Strept. anginosus
58	gerade	C. albicans	Strep. sanguinis	Strep. parasanguinis
59	gerade	E. faecium	E. casseliflavu	E. coli	C. albicans
60	gerade	E. faecalis	E. coli	C. lambica
61	gerade	E. faecalis	C. albicans	Staph. capitis	Pseudomonas aeruginosa
62	gerade	E. hirae	E. coli	C. albicans	Corynebacterium aurimucosum
63	gerade	E. faecalis	Raoultella ornithinolytica
64	Doppel-Pigtail	E. faecium	Enterobacter cloacae
65	gerade	E. faecium	Rothia mucilaginosa
66	Doppel-Pigtail	E. faecalis	E. faecium	E. coli	C. albicans	C. glabrata	Klebsiella oxytoca
67	gerade	E. faecalis	C. albicans	Klebsiella oxytoca	Enterobacter cloacae	Strept. anginosus
68	Doppel-Pigtail	E. faecalis	E. faecium	C. albicans	Staph. epidermidis	Proteus vulgaris
69	gerade	E. faecalis	E. avium	Strep. parasanguinis	Citrobacter youngae	Actinomyces viscosus
70	gerade	E. faecalis	E. coli	Enterobacter cloacae
71	Doppel-Pigtail	E. faecium	E. gallinarum	E. coli	Klebsiella pneumoniae	Pseudomonas aeruginosa
72	Doppel-Pigtail	E. faecalis	E. coli	C. glabrata	Strept. constellatus
73	gerade	C. albicans	Strep. parasanguinis	Strep. pneumoniae	Lactobacillus casei
74	gerade	E. coli	Proteus vulgaris	Raoultella planticola	Bacteroides uniformis
75	Doppel-Pigtail	E. faecium	C. albicans	C. glabrata	Pseudomonas aeruginosa
76	gerade	Klebsiella oxytoca	Strept. anginosus	Strep. oralis/mitis	Prevotella melaninogenica	Raoultella planticola
77	gerade	E. faecalis	C. albicans	Strep. parasanguinis	Staph. aureus	Prevotella melaninogenica
78	Doppel-Pigtail	E. faecalis	E. faecium	E. avium	Staph. aureus
79	Doppel-Pigtail	E. faecalis	C. albicans	Klebsiella oxytoca	Strep. salivarus ssp. salivarus	Bacteroides vulgatus	Ralstonia insidiosa
80	Doppel-Pigtail	E. faecalis	C. glabrata	Enterobacter cloacae	Strept. anginosus
81	Doppel-Pigtail	Enterobacter cloacae	Strep. sanguinis	Strep. parasanguinis	Prevotella melaninogenica	Citrobacter freundii
82	gerade	E. faecalis	C. albicans	Klebsiella oxytoca	Enterobacter cloacae
83	Doppel-Pigtail	Strep. parasanguinis	Corynebacterium striatum	Veilonella parvula
84	Doppel-Pigtail	E. gallinarum	E. casseliflavu	C. dubliniensis	Staph. epidermidis	Veilonella parvula	Corynebacterium bovis
85	gerade	E. faecalis	C. albicans	Raoultella planticola	Strep. salivarus ssp. salivarus	Cryptococcus huminocola	Staph. Saprophyticus
86	Doppel-Pigtail	E. faecium	C. albicans	E. faecalis	Prevotella oris
87	gerade	E. faecium	E. coli	C. albicans
88	Doppel-Pigtail	E. faecalis	E. faecium	C. kefyr	Klebsiella oxytoca	Cronobacter sakazakii
89	Doppel-Pigtail	E. faecalis	E. avium	E. casseliflavu	E. coli	Klebsiella pneumoniae	Bacteroides vulgatus
90	gerade	E. faecium	Staph. haemolyticus
91	gerade	E. faecalis	C. albicans	Proteus vulgaris	Proteus mirabilis
92	gerade	E. faecium	E. coli
93	Doppel-Pigtail	E. faecalis	E. coli	Bacteroides fragilis
94	gerade	E. faecium	C. albicans	Enterobacter aerogens	Strept. anginosus	Strep. oralis/mitis	Veillonella parvula
95	gerade	E. faecalis	E. avium	E. casseliflavu	Strep. oralis/mitis	Citrobacter koseri
96	gerade	E. faecalis	E. faecium	C. albicans	C. tropicalis	Vibrio alginolyticus	C. norvegen/incons
97	gerade	E. faecium	C. albicans	Strep. oralis/mitis
98	gerade	E. faecalis	E. coli	C. albicans	Strept. anginosus	Hafnia alvei	Haemophilus parainfluenzae
99	Doppel-Pigtail	E. faecium	C. albicans	C. krusei
100	gerade	E. faecium	E. faecalis	Propionibacterium avidum
101	Doppel-Pigtail	E. faecalis	E. faecium	Enterobacter cloacae	Bifidobacterium spp.	C. albicans
102	gerade	E. faecium	C. albicans	Staph. epidermidis
103	Doppel-Pigtail	E. faecium
104	gerade	E. faecalis	C. tropicalis	Enterobacter cloacae	Serratia marcescens	Haemophilus parainfluenzae
105	Doppel-Pigtail	E. casseliflavu	C. albicans	Lactobacillus rhamnosus	Veilonella parvula	Salmonella group
106	Doppel-Pigtail	E. faecalis	C. albicans	C. kefyr	Klebsiella oxytoca
107	Doppel-Pigtail	E. faecalis	E. coli	Strept. constellatus
108	Doppel-Pigtail	E. faecalis	E. coli	Staph. epidermidis
109	Doppel-Pigtail	E. faecalis	E. coli	C. glabrata
110	gerade	E. faecium	E. coli	Klebsiella pneumoniae	Pseudomonas aeruginosa	Bacteroides fragilis
111	Doppel-Pigtail	E. faecium	E. coli	Proteus mirabilis
112	gerade	E. faecalis	E. coli	Klebsiella pneumoniae
113	gerade	Staph. epidermidis	Prevotella melaninogenica	Abiotrophia defectiva	Acinetobacter baumannii complex
114	Doppel-Pigtail	E. faecium	E. coli	C. tropicalis	Strept. anginosus	Rhizobium radiobacter
115	gerade	E. faecalis	E. coli	C. albicans	Hafnia alvei
116	Doppel-Pigtail	E. faecalis	E. faecium	E. coli	C. albicans	Saccharomyces cerevisiae
117	gerade	E. faecalis	Klebsiella pneumoniae	Proteus vulgaris	Bacteroides thetaiotaomicron
118	Doppel-Pigtail	E. faecalis	E. avium	E. coli	C. albicans	Bacteroides fragilis
119	Doppel-Pigtail	E. faecalis	E. faecium	Enterobacter cloacae	Strep. oralis/mitis	Citrobacter braakii
120	Doppel-Pigtail	E. faecalis	E. faecium	C. albicans	Veilonella parvula	Citrobacter braakii
121	gerade	E. faecalis	E. faecium	C. glabrata	Citrobacter youngae	E. durans
122	gerade	E. coli	Prevotella melaninogenica	Morganella morganii	Streptococcus gallolyticus ssp. Gallolyticus
123	Doppel-Pigtail	E. coli	Klebsiella oxytoca	Strept. anginosus	E. durans	Clostridium perfringens	Mycobacterium avium
124	gerade	E. avium
125	Doppel-Pigtail	C. albicans	Strept. anginosus	Hafnia alvei
126	gerade	E. faecalis	E. faecium	C. albicans	C. glabrata	Staph. haemolyticus
127	Doppel-Pigtail	E. coli	Strept. anginosus	Proteus mirabilis	Bacteroides vulgatus
128	gerade	E. faecium	C. albicans	Klebsiella oxytoca	Strept. anginosus	Staph. aureus	Enterobacter amnigenus
129	gerade	E. faecalis	Citrobacter freundii
130	gerade	E. faecalis	E. faecium	C. albicans	Enterobacter cloacae	Prevotella melaninogenica
131	Doppel-Pigtail	E. faecium	E. coli	Klebsiella oxytoca	Strept. anginosus	Cronobacter sakazakii
132	gerade	E. faecalis	E. coli	Klebsiella oxytoca	Strept. anginosus	Prevotella buccae
133	Doppel-Pigtail	E. gallinarum	E. casseliflavu	E. coli	Strept. anginosus	Aeromonas hydrophila
134	gerade	E. coli	C. albicans	Klebsiella pneumoniae	Pediococcus pentosaceus
135	gerade	E. faecium	E. gallinarum	E. avium	E. coli	C. albicans
136	Doppel-Pigtail	E. coli	Enterobacter cloacae	Proteus vulgaris	Bacteroides thetaiotaomicron	Streptococcus gallolyticus ssp. Gallolyticus
137	gerade	E. faecalis	E. coli	Streptococcus gallolyticus ssp. Gallolyticus	Bifidobacterium ssp.
138	gerade	E. faecalis	E. coli	C. albicans	Staph. epidermidis	E. durans
139	gerade	E. faecalis	E. faecium	Staph. haemolyticus	Neisseria subflava
140	Doppel-Pigtail	E. faecalis	Klebsiella pneumoniae	Strept. anginosus	Hafnia alvei	Prevotella denticola
141	Doppel-Pigtail	E. faecalis	E. faecium	E. coli	Staph. aureus	Bifidobacterium ssp.
142	Doppel-Pigtail	E. faecium	Staph. haemolyticus
143	gerade	E. faecalis	C. albicans	Strep. oralis/mitis
144	Doppel-Pigtail	E. avium	E. coli	C. albicans	Proteus mirabilis	Pseudomonas aeruginosa	Bacteroides fragiles
145	Doppel-Pigtail	E. faecalis	Strep. oralis/mitis	Strep. parasanguinis	Rothia mucilaginosa
146	gerade	E. faecalis	C. albicans	Enterobacter cloacae	Strep. salivarus ssp. salivarus
147	Doppel-Pigtail	E. faecalis	E. faecium	C. albicans	Strep. parasanguinis
148	gerade	E. faecalis	E. coli	C. albicans	Klebsiella pneumoniae	Staph. haemolyticus	C. glabrata	C. parapsilosis
149	Doppel-Pigtail	E. faecium	E. coli	C. kefyr
150	gerade	E. coli	Enterobacter cloacae	Pseudomonas aeruginosa
151	gerade	E. faecalis	Klebsiella oxytoca	Enterobacter cloacae	Pseudomonas aeruginosa
152	gerade	E. faecalis	C. albicans	Strep. oralis/mitis
153	Doppel-Pigtail	Enterobacter aerogens	Strep. suis
154	Doppel-Pigtail	E. faecalis	E. gallinarum	E. coli	Enterobacter cloacae
155	gerade	E. faecalis	E. gallinarum	Morganella morganii	Citrobacter koseri	Parabacteroides distasonis
156	Doppel-Pigtail	Klebsiella oxytoca	Strept. anginosus
157	gerade	C. albicans	Proteus vulgaris	Pseudomonas aeruginosa	Bacteroides thetaiotaomicron
158	gerade	E. avium	C. albicans	Staph. epidermidis	Bacillus pumilus
159	gerade	E. coli	C. albicans	Enterobacter cloacae	Strept. anginosus	Strep. equi ssp. zooepidemicus	C. glabrata
160	Doppel-Pigtail	E. faecalis	E. coli	Citrobacter braakii	Lactococcus garvieae
161	Doppel-Pigtail	E. faecalis	E. faecium	E. coli	Strept. anginosus	Hafnia alvei	C. glabrata
162	Doppel-Pigtail	E. avium	E. coli	C. albicans	Strept. anginosus	Proteus mirabilis
163	gerade	E. faecalis	C. albicans	Pseudomonas aeruginosa	Citrobacter braakii	C. glabrata
164	Doppel-Pigtail	E. faecalis	E. avium	C. albicans	Bacteroides stercoris	C. glabrata
165	Doppel-Pigtail	E. faecalis	E. coli	C. albicans	Klebsiella oxytoca
166	gerade	E. faecalis	C. albicans	Morganella morganii	Bacteroides vulgatus
167	Doppel-Pigtail	E. faecalis	E. coli	Neisseria subflava	Strep. infantarius ssp. coli
168	Doppel-Pigtail	E. faecalis	E. casseliflavu	Pseudomonas aeruginosa	Gemella sanguinis
169	Doppel-Pigtail	E. avium	E. casseliflavu	E. coli	Klebsiella oxytoca
170	Doppel-Pigtail	E. faecium	C. albicans	C. colliculosa
171	Doppel-Pigtail	E. faecalis	Klebsiella oxytoca	Enterobacter cloacae	Strep. salivarus ssp. salivarus
172	gerade	E. faecalis	E. coli	C. albicans	C. glabrata
173	Doppel-Pigtail	E. faecium	C. albicans	Enterobacter cloacae
174	Doppel-Pigtail	E. coli	C. albicans	Lactobacillus rhamnosus	Bacteroides vulgatus	Lactobacillus plantarum
175	Doppel-Pigtail	E. faecalis	E. coli	Strept. anginosus
176	gerade	E. faecium	Strep. parasanguinis
177	gerade	Strept. anginosus
178	gerade	E. faecalis	Morganella morganii	C. guilliermondii
179	Doppel-Pigtail	E. faecalis	Enterobacter cloacae
180	Doppel-Pigtail	E. faecalis	C. albicans	Strept. anginosus	Pseudomonas aeruginosa
181	gerade	E. coli
182	gerade	E. faecalis	Enterobacter cloacae	C. albicans
183	gerade	E. faecalis	E. coli	Actinomyces odontolyticus
184	Doppel-Pigtail	E. faecalis	Klebsiella oxytoca	Citrobacter freundii
185	Doppel-Pigtail	E. faecalis	E. coli	C. albicans	Klebsiella pneumoniae
186	Doppel-Pigtail	E. faecalis	E. coli	Proteus vulgaris	C. glabrata	C. colliculosa
187	Doppel-Pigtail	E. faecalis	Klebsiella oxytoca	Enterobacter cloacae
188	gerade	E. faecalis	C. albicans	Hafnia alvei
189	Doppel-Pigtail	E. faecalis	E. coli	Strept. anginosus	Proteus mirabilis	Bacteroides ovatus
190	Doppel-Pigtail	C. albicans	Strep. parasanguinis
191	Doppel-Pigtail	E. faecalis	E. faecium	E. coli
192	gerade	C. albicans	Strept. anginosus	Neisseria subflava
193	Doppel-Pigtail	E. faecalis	Pseudomonas aeruginosa
194	Doppel-Pigtail	E. gallinarum	E. avium	E. coli	Bacteroides fragiles	C. albicans
195	gerade	E. coli	Strept. anginosus	Prevotella buccae
196	Doppel-Pigtail	E. faecalis	Prevotella melaninogenica
197	Doppel-Pigtail	E. coli	Staph. epidermidis	C. albicans
198	gerade	E. gallinarum	E. coli
199	Doppel-Pigtail	E. faecium	Enterobacter cloacae	Citrobacter braakii	Lactobacillus plantarum	C. albicans
200	gerade	E. faecalis	E. casseliflavu	E. coli	Klebsiella oxytoca	Strept. anginosus	Bacteroides uniformis	C. albicans
201	Doppel-Pigtail	E. faecalis	E. faecium	Enterobacter cloacae	Hafnia alvei	C. glabrata
202	Doppel-Pigtail	E. faecium	E. coli	C. albicans	C. kefyr
203	Doppel-Pigtail	E. faecalis
204	Doppel-Pigtail	E. faecalis	E. casseliflavu	E. coli	C. albicans	C. glabrata
205	Doppel-Pigtail	E. faecalis	C. albicans	Strept. anginosus	Citrobacter braakii
206	Doppel-Pigtail	E. faecium	C. albicans	Staph. epidermidis
207	gerade	E. faecalis	E. faecium	Enterobacter cloacae
208	Doppel-Pigtail	E. faecalis	E. casseliflavu	Proteus vulgaris	Hafnia alvei
209	gerade	E. faecalis	C. albicans	Strep. oralis/mitis	Staph. epidermidis
210	gerade	C. albicans	Strept. anginosus	Strept. constellatus
211	gerade	E. faecalis	E. coli	C. albicans
212	Doppel-Pigtail	E. faecalis	E. coli	Lactobacillus acidophilus
213	gerade	E. faecium	C. albicans	Haemophilus parainfluenzae	Neisseria subflava

## Sheet: Tab 2
Stent Nr.	Grund des Wechsels	Grunderkrankung
1	Stentverschluss	Proximale benigne Choledochusstenose, bedingt durch OP-Clip bei Z.n. Cholezystektomie
2	Stentverschluss	Cholangiosepsis mit biliokutaner Fistel bei Z.n. orthotoper Lebertransplantation mit Anti-HBc positivem Organ
3	W	Narbige DHC-Stenose (stentversorgt) bei chronischer Pankreatitis
4	E	Stenose bei Z.n. CCE bei symptomatischer Cholezystolithiasis
5	W	Z.n. orthotoper Lebertransplantation
6	W	Z.n. LTx
7	W	Benigne Gallengangsstenose bei Z. n. Lebertransplantation
8	W	HCC
10	Stentdislokation	CCC
11	W	Z.n. orthotoper Lebertransplantation
12	W	Unklare Gallengangsstenose
13	Stent-Dislokation	CCC
14	W	Zustand nach orthotoper Lebertransplantation bei ethyltoxischer Leberzirrhose, postoperative Stenose im Gallengang mit Stent-Einlage
15	W	Benigne Gallengangstenose
16	W	siehe 87
17	E	Cholezystolithiasis und Choledocholithiasis
18	Stentverschluss	Klatskin-Tumor Bismuth Typ IV
19	W	Zustand nach benigner Gallengangsstenose nach orthotoper Lebertransplantation
20	W	Chronische Pankreatitis mit distaler, benigner Gallengangsstenose und Duodenalstenose
21	E	Galleleckage nach Hemihepatektomie
22	W	Postoperative Gallengangsstenose der Hepatikusgabel und des DHC, progrediente Gallengangrarefizierung
23	W	Klatskin-Tumor Bismuth IV
24	W	Röhrenstenose bei chronischer Pankreatitis
25	W	siehe 122
26	W	siehe 6
27	E/A	siehe 24
28	W	Klatskin-Tumor Bismuth IV
29	Stentverschluss	siehe 18
30	E	Bauchtrauma
31	W/A	siehe 7
32	W	Chronische Pankreatitis mit Gallengangstenose
33	E	Biliom bei Cysticus-Stumpfinsuffizienz
34	E	siehe 71
35	W	Inoperabler Klatskin-Tumor (histologisch Adenokarzinom) mit plattenepithelialer Kodifferenzierung
36	W	siehe 1
37	E/A	Z.n. LTx
38	W	siehe 28
39	W	siehe 98
40	W	siehe 22
41	W	Juxtapapilläres Divertikel
42	E	siehe 18
43	W	Sekundär sklerosierende Cholangitis nach Lebertransplantation mit Verdacht auf Re-Zirrhose
44	W	siehe 201
45	E	siehe 71
46	W	siehe 122
47	E/A	Choledocholithiasis
48	W	siehe 8
49	W	siehe 32
50	E/A	siehe 6
51	W	siehe 87
52	W	Klatskin-Tumor Bismuth IV
53	W	Histologisch gesichertes metastasiertes Gallenblasenkarzinom
54	W	Papillenstenose
55	W	Gallenblasenkarzinom
56	W	siehe 81
57	E	siehe 15
58	E/A	Chronische Pankreatitis
59	E	Choledocholithiasis
60	W	siehe 87
61	E	V.a. Choledocholithiasis
62	V.a. Stentverschluss	Gallengangsstenose unklarer Ursache
63	Stent-Dislokation	PSC
64	W	Benigne Stenose des Duct. hepaticus sinister
65	W	siehe 62
66	Stentverschluss	CCC
67	W	siehe 201
68	Stentdislokation	siehe 28
69	Stentverschluss	Benigne DHC-Stenose
70	W	siehe 122
71	E/A	Cholangitis bei Choledocholithiasis
72	W	siehe 52
73	W	Symptomatische Cholezysto- und Choledocholithiasis mit mechanischer Cholestase und Cholangitis
74	W	siehe 32
75	Stentverschluss	Cholestase bei DHC-Stent-Okklusion
76	W	Pankreaskopfkarzinom
77	W	Gallenblasenkarzinom
78	W	PSC
79	W	siehe 55
80	W	Z.n. Hemihepatektomie rechts bei Kolon-Ca Metastasen, Z.n. Leckage Segment II
81	W	HCC
82	Stentverschluss	siehe 201
83	W	Stumpfes Bauchtraum mit V.a. Galleleckage
84	E/A	Choledocholithiasis
85	Stentverschluss	siehe 80
86	W	PSC
87	W	Peritoneal metastasierter Klatskin-Tumor Bismuth Typ IV
88	W	siehe 78
89	W	Benigne postoperative Stenose
90	Stentverschluss	LK-Kompression des DHC bei Sigma-Ca.
91	Stentdislokation	Z.n. LTx
92	W	siehe 10
93	W	Choledocholithiasis
94	Stentokklusion	Klatskin-Tumor Bismuth II
95	W	Z.n. orthotoper Lebertransplantation, ischämische Gallenwegsveränderungen mit rezidivierenden Stenosen im Sinne einer ITBL
96	W	siehe 87
97	Stentokklusion	siehe 94
98	W	Choledocholithiasis
99	W	siehe 95
100	Stentverschluss	siehe 122
101	W	Klatskin-Tumor Bismuth IV
102	W	Akute biliäre Pankreatitis bei Cholezystolithiasis mit Organkomplikationen
103	W	siehe 10
104	V.a. Stentdislokation	siehe 78
105	W	siehe 84
106	W	CCC
107	W	siehe 52
108	W	Klatskin-Tumor Bismuth Typ 4
109	W	siehe 201
110	E	Cholangiosepsis bei Choledocholithiasis
111	W/A	Z. n. Lebertransplantation o Benigne Gallengangsstenose
112	W	Z. n. orthotoper Lebertransplantation
113	W	CCC
114	W	siehe 76
115	W	siehe 54
116	W	siehe 87
117	E/A	siehe 93
118	W/A	Benigne Gallengangstenose
119	W	Ausgeprägte Choledocholithiasis mit multiplen Konkrementen
120	W	sieh 120
121	W	siehe 78
122	Stentverschluss	Chronische Pankreatitis mit rezidivierenden Schüben, benigne DHC-Stenose
123	W	siehe 43
124	W	Choledocholithiasis und Cholezystolithiasis
125	W	siehe 86
126	W	siehe 201
127	W	siehe 89
128	Stentverschluss	Pankreaskopfkarzinom mit Infiltration des Truncus coeliacus und Verdrängung der Vena portae
129	V.a. Cholangitis	siehe 78
130	Stentverschluss	Pankreaskopfkarzinom
131	W	siehe 43
132	W	siehe 98
133	E/A	siehe 84
134	E/A	CDL, juxtapapilläres Divertikel
135	Stentdislokation	siehe 28
136	W	siehe 52
137	E/A	siehe 122
138	E/A	Choledocholithiasis mit extra- und intrahepatischer Cholestase
139	Stentdislokation	siehe 78
140	W	sieh 120
141	E/A	siehe 43
142	W	siehe 43
143	W	siehe 201
144	Stentverschluss	Cholangitische Leberabszesse Segment VII/VIII und VI mit Sepsis und Fistelung zum Ductus hepaticus rechts
145	Stentverschluss	siehe 113
146	Stentdislokation	V.a. ITBL, Z.n. Lebertransplantation bei kryptogener Leberzirrhose
147	E	Rezidivierende Choledocholithiasis mit Cholangitis und Cholangiosepsis
148	W	siehe 80
149	E/A	Cholangitis bei Choledocholithiasis
150	W	siehe 98
151	W	siehe 98
152	Stentverschluss	Choledocholithiasis
153	Stentverschluss	siehe 113
154	W	siehe 108
155	W	Choledocholithiasis
156	E/A	siehe 86
157	W	siehe 52
158	W	Metastasiertes Cervix-Ca. mit obstruktiver Cholestase
159	W	siehe 1
160	W	Histologisch gesichertes Gallenblasen-Karzinom
161	W	Pankreaskopfkarzinom
162	W	siehe 89
163	V.a. Stentverschluss	siehe 201
164	E	Choledocholithiasis
165	W	Gallengangsstenose im Hilusbereich bei intrahepatischem cholangiozellulärem Karzinom
166	E/A	siehe 32
167	W	Z.n. orthotoper Lebertransplantation
168	W	sieh 120
169	Stentverschluss	Chronische Pankreatitis mit DHC-Stenose
170	W	siehe 201
171	W	siehe 184
172	E/A	HCC, postoperative GG-Leckage
173	W	Z.n. LTx
174	W	siehe 98
175	W	siehe 22
176	Stentverschluss	Choledocholithiasis bei Cholezystolithiasis
177	W	Klatskin-Tumor Bismuth IV
178	E/A	Benigne Gallengangstenose
179	W	siehe 78
180	E	Choledocholithiasis
181	E	Anastomosenleckage
182	E	Choledocholithiasis
183	W	Klatskin-Tumor
184	W	Klatskintumor Bismuth IV
185	Stentverschluss	siehe 144
186	W	Klatskin-Tumor Bismuth IV
187	W	siehe 108
188	W	PSC
189	W	siehe 89
190	W	Mechanische Cholestase bei malignitätsverdächtiger Gallengangsstenose
191	W	Metastatisch bedingte Stenose
192	Stentverschluss	Z.n. orthotoper Lebertransplantation
193	W	siehe 192
194	W	siehe 28
195	W	Benigne Gallengangstenose
196	W	IgG4 assoziierte Cholangitis
197	E	Choledocholithiasis
198	W	siehe 1
199	E/A	Choledocholithiasis mit Stenteinlage
200	W	siehe 165
201	W	Z.n. LTx
202	W	Klatskin-Tumor
203	W	siehe 78
204	W	Klatskin-Tumor Bismuth I mit Peritonealkarzinose
205	W	siehe 177
206	W	Hochgradiger V.a. Klatskin-Tumor Bismuth IV
207	W	siehe 173
208	W	siehe 120
209	W	Z.n. orthotoper Lebertransplantation
210	Stentdislokation	Malignitätsverdächtige Stenosen des Ductus hepaticus im Hilusbereich und intrahepatisch mit mechanischer Cholestase und Verdacht auf Leberabszess mit Fistel/Perforation Segment IV
211	W	Gallengangsstenose bei Verdacht auf Pankreaskarzinom
212	E/A	ITBL bei Z. n. orthotoper Lebertransplantation
213	W	Zustand nach Lebertransplantation
E	E	Stententfernung bei Z.n. Gallengangsleckage bei Z.n. Relaparotomie

## Sheet: Tab 3
Pat.-Nr.	Leuko1	CRP1	PCT1	Bili1	AP1	GGT1	ASAT1	ALAT1
1	12.3	42.76	-	46.4	9.16	13.84	1.11	3.13
2	6.1	109.34	0.49	39.4	3.99	5	3.51	0.89
3	8.3	13.21	-	11.7	6.58	9.67	0.44	0.29
4
5	3.4	5.05	0.18	7	3.92	0.45	0.94	0.83
6	4.4	2.91	-	5.4	2.37	1.8	0.43	0.52
7	7	5.49	-	8.3	1.77	1.18	0.5	0.36
8	3.7	16.15	-	15.6	2.87	0.94	0.94	0.73
9	6.3	9.87	-	3.8	2.24	0.88	0.47	0.25
10	4.4	48.62	-	71.5	7.7	14.99	1.46	1.73
11	5.1	0.77	0.06	9.1	2.93	1.55	0.54	0.21
12	8.8	1.01	-	21	1.19	1.09	0.24	0.18
13	5.5	58.21	-	143.7	10.49	33.34	1.92	0.84
14	5.8	4.41	-	8.3	3.34	11.56	1.27	2.28
15	6.7	12.95	-	6.8	3.66	3.36	0.47	0.64
16	2.9	19.86	-	16.2	5.75	12.68	0.95	1.08
17	4	1.78	-	7.2	2.39	4.07	0.53	0.53
18	8.9	141.18	-	19	10.32	22.8	1.38	1.54
19	2.8	9.72	-	144.8	1.98	0.46	0.54	0.14
20	11.1	32.01	-	5.9	4.71	5.44	0.4	0.28
21	10	3.67	-	5	1.15	1.4	0.48	0.18
22	4.2	18.41	-	23.8	2.19	2.41	0.39	0.24
23	11.8	34.11	-	92.2	13.68	13.11	1.14	2.71
24	6.2	7.95	-	7.8	1.47	1.91	0.43	0.18
25	9.9	0.93	-	23.7	1.87	5.54	0.61	0.46
26	4.4	3.01	-	5.3	1.81	1.28	0.31	0.31
27
28	6.3	17.45		65.2	9.38	10.24	2.33	1.43
29	3.3	5.7	-	3.9	3.82	7.48	0.52	0.38
30	8	3.29	-	6.5	1.55	0.69	0.45	0.31
31	8.2	13.42	-	3.8	1.9	0.91	0.32	0.27
32	5.8	15.25	-	4.6	1.24	0.73	0.44	0.25
33	7.7	2.82	-	12.3	1.26	0.44	0.44	0.35
34	5.5	6.62	-	10.8	2.32	3.07	0.56	0.32
35	14.6	71.54	-	19.3	18.64	14.11	2.22	2.11
36	18	2.2	-	6.2	2.33	1.83	0.41	0.43
37
38	8.1	4.06	-	10.9	3.18	1.53	0.34	0.21
39	8.9	9.49	-	12.2	0.93	0.6	0.43	0.36
40	3.1	11.11	-	19.2	3.14	4.68	1.56	0.75
41	6.3	3.79	-	13	1.53	0.16	0.39	0.24
42	5.2	81.63	-	19.7	10.06	22.86	0.78	0.62
43	3.7	11.53	-	17.6	2.57	4.14	1.04	0.82
44	4.7	4.77	-	11.2	1.1	0.4	0.27	0.44
45	4.2	15.68	-	12	1.79	1.74	0.5	0.27
46	12.1	9.96	-	25.2	2.43	6.22	0.47	0.58
47	6.5	1.84	-	7.7	1.27	0.72	0.74	0.64
48	4.6	11.49	-	26.5	2.27	0.73	1.13	0.75
49	5.1	5.1	-	4.9	0.97	0.52	0.34	0.21
50	6.3	3.08	-	8.3	1.47	1.1	0.33	0.26
51	5.4	75.13	-	45.5	3.29	4.24	0.59	0.5
52	9.8	90.89	-	73.1	9.05	6.15	1.3	0.86
53	12.3	99.54	-	7.9	7.84	16.24	1.64	0.48
54	6.3	17.16	-	11.4	3.95	5.21	0.46	0.68
55	8	14.93	-	39.7	8.07	15.78	1.95	1.06
56	11.6	234.82		19.4	5.19	7.78	1.13	0.51
57	8.5	0.33	-	10.3	2.92	2.42	0.47	0.69
58	7.1	0.74	-	4.7	1.01	0.48	0.32	0.19
59	9.2	18.68	-	3.6	1.53	0.82	0.24	0.21
60	4.8	18.69	-	9.5	2.45	3.49	1.07	0.48
61	13.3	13.02	-	6	1.85	0.59	0.5	0.53
62	7.3	95.19	-	16.3	1.99	5.22	0.67	1.54
63	10.3	68.61	-	38.6	12.72	6.8	1.12	1.26
64	4.9	0.58	-	15.6	2.88	5.3	0.69	0.99
65	4.6	6.95		10.6	-	5.35	0.37	0.77
66	10.2	188.51	-	46.7	21.34	16.36	1.08	0.42
67	3	23.3	-	6.7	1.43	0.73	0.33	0.34
68	12.5	97.86	-	57.1	7.09	2.42	0.4	0.23
69	5.6	114.05	-	6.3	3.65	4.18	0.65	1.24
70
71	5.3	10.25	-	9.3	1.48	1.37	0.46	0.25
72	11	138.95	-	27.3	12.58	4.27	0.84	0.5
73	5.3	84.77	-	4	1.35	0.76	0.46	0.37
74	6.9	24.12	-	6.3	1.33	0.43	0.32	0.2
75	9	77.87	-	-	13.82	23.43	1	0.52
76	6.8	-	-	87.2	-	27.29	1.06	1.9
77	10	40.02	-	358.8	7.25	6.46	3.54	2.3
78	5.8	14.45	-	28.8	3.65	8	0.85	1.54
79	7.3	21.25	-	11.1	3.36	2.25	0.7	0.23
80	9.8	142.09	-	11.6	2.75	7.35	1.4	0.92
81	14.4	137.84		26.2	7.38	6.4	1.18	0.39
82	7.5	55.26	-	9.5	1.53	1.1	0.35	0.48
83	7.4	27.04	-	31.8	-	9.67	0.68	0.95
84	5.9	43.7	-	7.7	4.18	8.58	1.05	1.27
85	7.8	188.75	-	6.4	5.87	16.07	0.55	0.39
86	6.5	0.86	-	8.3	3.24	2.2	0.77	0.67
87	2.5	71.21	-	44.5	5.81	6.08	0.68	0.39
88	5.8	43.07	-	46.6	2.4	8.01	0.88	1.43
89	4.5	9.78	-	7.5	4.3	6.28	0.42	0.39
90	26.5	216.2		256	8.32	4.6	4.47	0.93
91	8.3	2.68	-	9	2.48	0.42	0.51	0.25
92	4.6	12.62	-	3.4	3.05	3.94	0.34	0.26
93	5.9	4.54	-	6	1.9	2.06	0.4	0.42
94	11.2	79.32	-	243.5	6.19	7.79	1.09	1.54
95	13.4	103.83	6.98	94.5	9.59	2.94	1.31	0.9
96	4.5	57.13	-	25.5	-	6.09	0.53	0.27
97	9.2	21.09	-	398.1	13.45	27.57	2.49	2.93
98	8.3	2.33	-	9.7	0.92	0.46	0.58	0.91
99	10.9	33.1	-	154	15.95	5.46	1.66	1.92
100	7.5	55.06	-	130.2	3.2	5.81	0.66	1.14
101	7.3	22.84	-	23.1	5.68	12.27	0.67	0.62
102	12	-	-	5.6	-	-	-	-
103	9.2	34.46	-	4.9	10.85	27.2	0.68	0.82
104	5.8	5.37	-	15	2.12	4.09	0.52	0.66
105	8.5	3.64	-	15.7	2.68	4.71	3.64	2.42
106	38.3	134.85	-	21.3	6.1	2.69	0.58	0.51
107	14.7	73.56	-	234.3	7.13	3.48	1.4	1.06
108	9.3	225.81	-	8.2	3.27	6.14	0.35	0.48
109	6.5	86.09	-	7.3	1.37	0.98	0.27	0.4
110	8.3	13.46	-	6.2	2.31	0.95	0.28	0.19
111	6.3	4.47	-	7.6	4.56	1.96	0.71	0.37
112	8	3.35	-	18.3	3.36	7.67	0.4	0.3
113	8.9	103.4	-	55.4	5.79	5.96	2.4	6.98
114	18.3	-	-	41.5	13.15	42.74	0.52	0.46
115	7.1	5.83	-	5.7	1.51	1.46	0.39	0.38
116	4.5	96.38	-	24	5.29	5.05	0.49	0.13
117	6.7	7.23	-	6.9	2.46	2.45	0.63	1.91
118	7.8	9.3	-	2.6	2.6	2.02	0.28	0.18
119	4.1	2.32	-	3.1	3.14	0.79	0.22	0.11
120	3.5	-	-	-	-	-	-	-
121	6.3	4.81	-	16	1.94	4.5	0.6	0.6
122	9.1	127.34	-	92.9	2.42	3.37	0.75	0.87
123	3.6	18.56	-	16.5	3.94	5.91	1.22	0.78
124	15	70.74		62	5.54	7.71	0.41	1.08
125	7	0.99	-	10.5	4.57	4.12	0.75	1.12
126	7.3	10.26	-	3.3	2.31	6.36	1.09	2.18
127	2.7	108.37	-	10.9	3.84	6.61	1.23	0.61
128	0.6	88.43	0.32	22.5	4.17	3.89	2.48	1.1
129	6.6	43.42	-	76.3	3.33	7.29	1	1.52
130	13.2	112.74	-	112.6	6.21	26.3	1.82	2.86
131	5.2	127.3	-	33.6	2.05	4.77	1.36	0.88
132	10	2.62	-	25.4	1.21	1.33	1.7	1.38
133	5.1	1.56	-	7.8	1.9	1.2	0.57	0.6
134	13.7	98.71	-	54	3.9	6.17	1.47	2.86
135	5.4	61.37	-	194.2	11.32	3.16	1.32	0.85
136	7.6	60.12	-	60.4	10.33	8.34	0.68	0.68
137	8.7	69.98	-	108	2.41	4.16	0.64	0.75
138	7.5	44.99		11.2	1.6	7.52	0.41	0.38
139	6.5	13.81	-	62.7	2.4	6.44	0.94	1.54
140	4.7	1.64	-	3.2	2.67	0.54	0.24	0.19
141	3.4	12.31	-	28.6	3.31	5.66	1.32	0.71
142	5.8	115.29	-	89.4	2.04	2.8	1.07	0.58
143	5.6	44.2	-	4.4	1.83	2.41	0.38	0.48
144	7.2	38.58	0.13	2.5	3.21	6.95	0.18	0.19
145	9.9	192.18	-	11.9	4.07	2.7	1.04	2.28
146	3.1	0.86	-	11.5	2.44	0.57	0.38	0.28
147	7.7	17		16	-	3.52	0.48	0.7
148	7.6	173.93	-	3.6	1.89	2.03	0.49	1.01
149	8	26.8	-	192.7	4.57	4.68	1.1	0.48
150	9.5	6.22	-	8.1	1.19	0.48	0.79	0.62
151	9.5	6.22	-	8.1	1.19	0.48	0.79	0.62
152	7	6.78	-	5.7	1.13	0.32	0.41	0.41
153	6.2	25.31	-	21.6	4.74	7.34	2.78	6.99
154	5.9	5.71	-	11.2	2.96	14.67	1.36	0.89
155	9.4	3.09	-	6.6	1.77	1.81	1.07	1.24
156	7.1	0.72	-	7.7	2.27	1.43	0.51	0.65
157	13.4	122.41	-	66.5	11.16	5.28	0.89	0.5
158	13.2	183.42	-	25.5	18.03	19.5	0.86	0.7
159	17.1	4.44	-	9.5	2.68	3.79	0.63	0.87
160	9.7	239.36	-	53.7	14.59	23.77	1	1.76
161	25.3	70.43		101.3	5.13	4.51	0.41	0.46
162	4.1	4.84	-	6.4	2.48	1.01	1.32	0.37
163	6	37.63		25	6.01	9.14	1.52	2.72
164	7.3	35.77	-	6.7	1.47	0.4	0.24	0.08
165	7.7	8.98	-	8.8	1.34	1.54	0.58	0.35
166
167	3.9	48.91	-	7.1	5.28	5.57	0.46	0.49
168	5.5	5.08	-	3	2.13	0.45	0.27	0.18
169	9.1	9.51	-	4.4	15.88	41.81	1.17	1.01
170	12.2	11.44	-	8.8	3.18	2.74	0.37	0.64
171	8.5	24.95	-	14.2	5.55	19.2	0.94	0.53
172	8.5	20.12	-	5	2.67	5.12	0.39	0.59
173	3.6	4.73	-	6.7	0.82	0.39	0.9	1.26
174	8.2	3.35	-	11.3	1	0.37	0.77	0.64
175	3.9	58.47	-	37.8	1.46	2.81	0.92	0.3
176	11.2	18.88	-	13.6	3.74	13.4	3.06	2.48
177	5	9.86	-	41.4	9.45	17.25	4.61	7.35
178	8	18.29	0.06	5.2	1.6	0.15	0.27	0.14
179	6.8	52.22	-	47	3.86	5.86	0.91	1.49
180	5.9	2.65	-	23.6	1.15	1.01	0.54	0.32
181	1.5	45.15	0.93	13.1	11.48	4.66	0.35	0.17
182	7.1	6.74	-	5.9	2.62	0.77	0.32	0.15
183	4.6	4.08	-	6	3.69	2.64	0.51	0.42
184	8.7	1.89	-	8.9	3.01	10.43	1.1	0.89
185	6.4	28.7		3.9	2.31	4.93	0.33	0.53
186	9.3	109.26	-	18	5.65	6.08	0.55	0.69
187	7	4.53	-	3.3	2.05	12.08	0.52	0.57
188	4	20.84	-	96.5	5.8	0.91	1.99	1.24
189	3.1	5.15	-	9.8	2.54	0.83	0.41	0.2
190	9.3	8	-	33.6	3.69	7.12	0.59	0.64
191	5.9	6.76	-	19.4	18.53	23.71	1.5	1.03
192	2.8	28.41	0.28	165.2	11.35	17.03	3.32	2.79
193	3.7	49.67	-	149.9	11.44	17.29	2.65	2.81
194	5.6	7.96	-	7	3.61	1.68	0.34	0.17
195	10.3	73.67	-	130	1.39	2.3	0.74	0.47
196	7.6	5.54	-	17.4	2.47	2.91	0.89	1.11
197	16.4	176.05	-	14.9	4.54	7.93	0.4	0.98
198	17.9	1.57	-	5.4	2.1	1.64	0.56	0.79
199	8.6	1.24	-	8.2	1.5	0.25	0.25	0.24
200	7.3	14.59	-	7.6	1.42	1.54	0.62	0.38
201	4.1	32.83	-	5.7	1.69	1.1	0.4	0.43
202	10	-	11.47	128.9	16.01	8.52	2.1	1.39
203	9.7	253.75	-	102.1	3.11	3.9	2.08	2.61
204	6.2	37.14	-	20.6	10.93	4.31	2.76	1.46
205	10.1	68.38	1.2	41.9	7.68	6.28	1.67	1.61
206	6.8	40.14	-	209.3	4.96	9.88	0.72	1.29
207	4.6	2.7	-	8.1	0.86	0.43	0.51	0.54
208	7.3	3.63	-	4.4	1.7	1.46	0.45	0.24
209	2.6	29.56	-	48.5	6.46	9.61	2.09	2.96
210	8.8	44.52	-	214.2	8.39	8.22	1.16	1
211	14.7	240.89	-	69.3	8.63	25.01	2.11	2.6
212	4.7	5.64	-	11.9	2.14	0.77	0.75	0.59
213	3.3	28.43	-	17.2	9.88	18.38	1.28	2.11

## Sheet: Tab 4
Empfindlichkeitstestung (EUCAST)
Stent-Nr.	Erreger	Isolat	ampicillin/sulbactam	piperacillin/tazobactam	cefuroxime	cefotaxime	imipenem	meropenem	gentamicin	amikacin	doxycycline	trimethoprim-sulfamethroxazole (SXT)	ciprofloxacin	moxifloxacin	ampicillin	piperacillin	ceftibuten	ceftazidim	aztreonam	levofloxacin	ertapenem	tobramycin	colistin	doripenem	fosfomycin	tigecycline	Penicillin G	Oxacillin	Daptomycin	Vancomycin	Teicoplanin	Rifampicin	Clindamycin	Linezolid	Erythromycin	Amphotericin B	Flucytosin	Fluconazol	Itraconazol	Voriconazol	Caspofungin	Posaconazol
001	C. albicans	1a																																		0.5	0.16	0.5	0.5	<	<
002	E. coli	2c		<	<	<	<	<	<				<			<		<					<			<
002	E. gallinarum	2d	0,5				1,5		2			>																		8	1.25			0.75
002	C. glabrata	2g																																		1.5	0.006	24	>	1.5	<
002	C. albicans	2h																																		0.75	0.047	0.38	0.75	0.016	<
002	Serratia marcescens	2a	<	<		<	<					<	<		<			<					<		64
003	Kleb. Pneumoniae	3a	<	<		<	<					<	<		<			>					<		<
003	Pseudomonas stutzeri	3b
004	Kleb. pneumoniae	4a	<	<		1,0	<					<	<		<			>					<		>
004	Lactoba. Rhamnosus	4e
004	Strep. Parasanguinis	4f			<	<			<				<	<													>	1	<	<	<	<	<	<	<
005	E. coli	5d		2	2	0,06	0,125	<	0,25				<			1		0.25					0.25			0.25
005	E. faecalis	5e	1				>		8			>																		2	1.5			2
006	E. coli	6a		0,5	1	<	0,125	<	1				<			0.5		0.25					0.25			0.25
006	Enterobacter cloacae	6c	<	<		<	<					<	<		<			<					<		<
006	E. faecium	6k	0,5				4		12			0.19																		1	1			2
007	E. coli	7b		2	>	32	0,25	0,125	0,5				>			>		2					0,5			0,25
007	E. faecalis	7f	0,25				1		>			>																		0.5	0.094			2
007	Kleb. Pneumoniae	7f	<	>		>	>					1	<		<			>					<		<
007	C. albicans	7h																																		2	0.12	kleine	0.004	0.12	0.064
008	C. albicans	8f																																		1	0.023	1.5	0.25	0.16	0.16
008	C. kefyr	8i																																		0.75	0.5	0.5	0.094	0.12	0.125
009	Enterobacter cloacae	9a	<	<		<	<					<	<		<			<					<		<
009	E. faecalis	9f	0,19				0,75		>			>																		0.19	<			1.5
010	E. faecium	10a	>				>		>			>																		1	0.38			1
011	Kleb. Oxytoca	11c	<	64		>	>					1	<		<			>					<		<
012	Kleb. Pneumoniae	12b	<	<		>	1					<	<		<			8					<		<
012	E. casseliflavus	12e	0,5				<		2			>																		6	1.5			4
012	E. hirae	12f	2,5				>		16			0,125																		1.5	<			2
013	Strep. Anginosus	13d			0,125	<			<				<	<													<	<	>	16	4	>	>	2	>
013	C. albicans	13g																																		1.5	0.08	0.75	0.064	0.008	0.047
014	E. hirae	14e	0,38				4		96			0,25																		2	0.125			2
015	Enterobacter cloacae	15a	<	<		<	<					<	<		<			<					<		<
015	Trueperella bernardiae	15c
015	C. albicans	15g																																		1	0.004	2	0.006	0.006	0.047
016	E. coli	16a		16	>	>	0,25	0,125	96				>			>		32					0,5			0,5
016	E. faecium	16d	1,5				4		16			0,125																		0.75	2			1.5
016	C. albicans	16f																																		0.38	<	0.38	0.008	0.016	0.023
016	C. krusei	16g																																		0.38	3	>	0.25	0.125	0.094
017	Kleb. Pneumoniae	17b	<	<		<	<					<	<		<			<					<		<
017	E. gallinarum	17e	0,5				2		3			0,125																		8	0.25			0.25
018	Kleb. Pneumoniae	18c	<	16		<	>					0,125	<		<			<					<		<
018	E. casseliflavus	18e	<				0,25		4			<																		2	0.25			1
018	C. albicans	18f																																		1.5	0.004	0.19	0.012	>	0.25
018	C. glabrata	18g																																		1.5	<	>	>	4	0.25
019	E. coli	19b		16	2	0,125	0,125	0,125	0,5				0,03			3		0,5					0,125			0,25
019	E. faecalis	19c	0,38				>		2			0,25																		2	<			4
019	Staph. Haemolyticus	19e
019	C. albicans	19f																																		1.5	0.12	0.125	0.094	>	0.008
020	E. coli	20c		0,75	>	8	<	<	0,125				<			>		0,25					0,125			0,25
020	C. glabrata	20f																																		0.38	0.012	192	>	1.5	0.094
021	Staphylococcus aureus	21e			0,5	0,06			0,25				2	0,125													0.06	0.5	0.06	0.5	0.5	>		0.5	0.25
021	Proteus mirabilis	21a
021	Proteus vulgaris	21a
022	E. faecium	22d	0,75				6		16			0,125																		0.75	1.5			3
022	Strep. Anginosus	22e			<	<			<				<	<													<	<	>	16	4	>	0.125	1	>
023	E. faecalis	23d	0,38				1		2			<																		1.5	0.19			2
023	C. albicans	23e																																		0.5	0.094	0.75	0.5	0.016	0.003
024	Microbacter flavescens	24b
024	E. faecium	24c	32				>		12			>																		2	2			3
024	C. albicans	24e																																		0.5	0.047	0.064	0.19	0.016	0.125
024	C. glabrata	24f																																		>	0.008	48	>	4	0.094
024	C. tropicalis	24g																																		0.023	>	0.38	0.19	0.094	0.064
025	E. faecium	25c	>				>		64			>																		1	2			2
025	Proteus vulgaris	25d
026	Hafnia alvei	26a
026	E. faecalis	26b	<				0,25		>			>																		1	<			3
027	Staph. Vitulinus	27a
027	C. tropicalis	27e																																		0.125	>	0.25	0.75	0.094	0.064
027	C. glabrata	27f																																		0.38	0.016	24	>	0.75	0.094
028	Kleb. Oxytoca	28b	>	>		>	>					8	>		>			>					>		>
028	Strep. Gallolyticus ssp. Gallolyticus	28c			<	<			<				<	<													<	<	>	16	8	>	>	1	>
028	Yersinia pseudotubercolosis	28d
028	C. albicans	28f																																		0.125	0.008	0.25	0.064	0.006	0.064
029	E. faecium	29c	>				>		16			>																		1	1			2
029	C. glabrata	29d																																		0.5	0.006	32	>	0.75	0.125
029	C. albicans	29e																																		0.032	0.016	0.19	0.047	0.006	0.094
030	Serratia marcescens	30b
030	E. faecalis	30d	0,38				1		0,25			0,125																		0.5	<			2
031	E. coli	31a		2	>	>	0,25	<	0,25				2			>		2					0,38			0.5
031	E. casseliflavus	31b	0,38				0,38		3			<																		2	0.5			1.5
031	E. faecalis	31c	0,25				1		>			>																		1.5	<			0.5
031	C. albicans	31d																																		0.25	0.032	0.094	0.75	0.012	0.047
032	Providencia rettgeri	32a
032	Prevotella melaninogenia	32c
032	C. albicans	32																																		0.19	0.094	0.125	0.19	0.012	0.047
033	E. coli	33a		<	<	<	<	<	<				<			<		<					<			<
033	Kleb. Pneumoniae	33b	<	64		>	>					<	<		<			>					<		<
033	Strep. Anginosus	33d			>	>			0,25				>	0,03													>	>	<	<	<	<	<	<	<
033	C. albicans	33e																																		0.125	0.023	0.064	0.19	0.006	0.047
034	Morganella morganii	34c
034	E. casseliflavus	34d	0,125				0,5		2			<																		1.5	<			1
034	Kleb. Pneumoniae	34e	<	<		<	<					<	0,03		<			0,5					0,06		>
034	Cryptococcus laurentii	34e
035	E. faecium	35b	>				>		8			0,125																		1.5	2			2
035	C. albicans	35																																		0.38	0.016	0.19	0.19	0.016	0.064
036	Kleb. Pneumoniae	36b	<	<		<	<					<	<		<			<					<		<
036	C. albicans	36																																		0.19	0.064	0.125	1.5	0.008	0.047
037	E. coli	37a		3	3	0,125	0,25	<	0,5				0,06			4		1					<			<
037	Moraxella osloensis	37c
037	E. faecalis	37d	0,75				1,5		3			0,125																		0.25	<			1.5
038	Strep. Gallolyticus ssp. Pasteurianus	38a			<	<			<				<	<													<	<	<	<	<	<	<	<	<
038	Strep. Oralis	38b			<	<			<				<	0,125													<	<	>	8	4	0.06	4	>	0.25
038	E. coli	38c		2	2	0,06	0,125	<	0,5				0,03			4		0,25					<			<
038	Hafnia alvei	38d
038	Leifsonia aquatica	38e
038	C. albicans	38																																		>	>	>	>	>	>
039	E. faecalis	39a	0,5				0,5		0,5			0,125																		2	<			1.5
039	Kleb. Pneumoniae	39b	<	>		>	>					8	0,25		<			>					4		>
039	Kleb. Oxytoca	39c	<	<		<	<					<	<		<			<					<		<
039	C. albicans	39																																		0.25	0.125	0.25	0.094	0.006	0.064
040	E. faecium	40a	1				3		8			0,25																		1	1			0.5
040	E. coli	40b		2	>	>	0,25	<	2				>			>		4					0,5			0.25
040	Strep. anginosus	40e			<	<			<				<	<													<	<	<	<	<	<	<	<	<
040	Escherichia hermanii	40f		<	<	<	<	<	<				<			<		<					<			<
041	Corynebacterium pseudodiphteritium	41a
041	E. faecium	41d	1,5				4		8			>																		0.5	2			0.75
041	E. casseliflavus	41e	0,125				0,25		2			<																		3	0.25			0.5
042	E. coli	42b		2	2	0,06	0,25	<	0,5				0,06			2		0,5					0,06			0.125
042	Strep. Anginosus	42e			<	<			<				<	<													<	<	<	<	<	<	<	<	1
042	Lactoba. Rhamnosus	42f
043	Strep. Anginosus	43a			<	<			0,125				2	<													<	0.125	0.25	0.125	<	<	<	<	<
043	E. coli	43b		1	1	0,06	0,25	0,125	1				0,25			2		0,5					0,25			0.25
043	Kleb. Oxytoca	43c	<	<		<	<					<	<		<			<					<		<
044	E. faecalis	44a	0,8				1		>			>																		2	0.5			1
044	Enterobacter cloacae	44b	2	1		0,06	0,25					0,125	0,03		2			0,25					0,5		16
044	C. glabrata	44d																																		0.25	0.003	32		0.75	0.19	>
044	C. albicans	44e																																		0.19	0.008	1		0.003	0.047	0.032
045	Actinomyces odontolyticus	45a
045	Kleb. Pneumoniae	45b	0,25	>		>	0,125					<	<		<			>					4		<
045	E. coli	45d		1	1	<	0,125	<	0,5				<			2		1					<			<
045	Morganella morganii	45e
045	E. avium	45f	0,25				0,25		1,5			>																		0.75	0.19			1
045	Cryptococcus laurentii	45g
046	Propionibacterium propionium	46a
046	Enterobacter cloacae	46b	4	0,5		0,06	0,25					0,125	<		4			0,125					0,5		1
046	E. coli	46c		2	2	0,06	0,125	<	0,5				<			32		0,5					<			<
046	E. faecalis	46d	0,38				1,5		2			0,19																		1	0.19			2
047	E. faecalis	47a	0,38				0,5		1			<																		3	0.25			2
047	Enterobacter cloacae	47b	16	4		0,25	0,25					0,125	0,125		16			0,5					0,5		32
047	Hafnia alvei	47c
047	Strep. anginosus	47d			<	<			<				<	<													<	<	<	<	<	<	<	<	<
048	Actinomyces odontolyticus	48a
048	E. coli	48b		1	1	<	1	<	0,25				>			2		0,25					0,06			<
048	Strep. Constellatus	48c			4	0,06			1				0,03	0,125													>	>	>	>	>	32	>	>	>
048	Strep. anginosus	48d			<	<			4				0,25	2													<	<	4	4	32	<	<	0.5	0.25
048	C. albicans	48e																																		0.25	0.016	0.19		<	0.032	0.023
049	Proteus vulgaris	49a
049	E. coli	49b		1	1	0,06	0,125	<	0,5				<			2		1					0,5			0.125
049	Raoultella planticola	49c
049	E. avium	49d	0,25				0,5		2			>																		0.75	0.19			1
049	C. albicans	49e																																		0.25	0.012	0.19		<	0.047	0.006
050	E. coli	50c		0,5	1	0,023	0,125	<	0,5				0,012			1		0,5					0,5			0.25
050	E. faecalis	50e	0,38				0,75		>			>																		2	0.25			1
051	E. coli	51b		32	>	>	0,25	0,125	32				>			>		32					<			<
051	E. faecium	51c	3				>		12			0,25																		3	1			1
051	C. albicans	51e																																		<	<	<		<	<	<
052	Strep. Constellatus	52a			<	<			<				<	<													<	<	>	>	8	>	>	1	>
052	E. coli	52c		2	2	0,06	0,25	<	1				<			1		1					0,25			<
052	C. albicans	52e																																		0.19	0.012	0.38		0.006	0.047	0.006
053	E. gallinarum	53a	0,5				1		3			>																		16	2			2
053	E. faecium	53c	16				>		>			>																		1	1.5			4
053	C. albicans	53d																																		0.125	0.012	0.5		<	0.094	0.004
054	E. coli	54a		>	>	>	0,5	0,25	0,5				0,03			>		>					0,5			0.5
054	Citrobacter freundii	54b
054	E. faecalis	54c	0,5				1,5		3			0,25																		6	2			4
054	C. parapsilosis	54d																																		0.023	0.047	0.19		0.003	0.75	0.012
054	C. albicans	54e																																		0.032	0.047	0.125		0.012	0.064	0.008
055	Prevotella melaninogenia	55a
055	E. faecalis	55c	0,5				1		1,5			0,5																		2	0.25			4
055	C. albicans	55																																		0.008	0.032	0.125		0.008	0.25	>
056	E. casseliflavus	56a	0,25				0,5		2			<																		3	2			8
056	Kleb. Oxytoca	56b	<	<		<	<					<	<		<			<					<		<
056	E. coli	56c		16	>	16	0,5	0,125	0,5				<			32		64					0,06			1
056	E. faecium	56d	>				>		16			0,125																		2	2			8
056	C. albicans	56																																		0.064	0.012	0.25		0.004	0.125	0.008
057	Enterobacter cloacae	57a	<	<		<	<					<	<		<			<					<		<
057	E. coli	57b		2	2	0,06	0,125	<	0,25				0,03			2		0,25					0,5			0.25
057	Strep. anginosus	57d			<	<			<				<	<													<	<	>	16	4	>	>	2	>
057	E. faecium	57e	>				8		12			<																		6	1			4
057	C. albicans	57																																		0.012	0.032	0.25		0.023	0.064	0.012
058	Strep. Sanguinis	58a			<	<			<				<	<													<	<	<	<	<	<	<	<	<
058	Strep. Parasanguinis	58b			<	<			<				<	<													<	<	<	<	<	<	<	<	<
058	C. albicans	58																																		0.125	0.047	0.125		0.008	0.064	0.008
059	E. casseliflavus	59a	1				1		2			0,25																		4	2			2
059	E. coli	59b		2	4	0,25	0,25	0,125	0,5				0,03			>		<					0,5			<
059	E. faecium	59c	64				>		>			>																		1	0.5			6
059	C. albicans	59																																		0.047	0.047	0.094		0.004	0.125	0.016
060	E. coli	60a		32	>	>	0,25	<	32				>			>		32					0,5			<
060	E. faecalis	60c	0,25				1		8			0,25																		2	0.5			4
060	C. lambica	60d																																		0.047	4	4		0.064	0.047	0.064
061	E. faecalis	61a	0,5				2		4			0,125																		4	2			6
061	Staph. Capitis	61b
061	Pseudomonas aeroginosa	61c
061	C. albicans	61																																		0.047	0.047	0.094		0.004	0.125	0.016
062	E. coli	62a		1	1	0,06	0,25	0,125	0,5				<			>		0,25					1			0.25
062	E. hirae	62b	0,25				1		16			>																		1	<			4
062	Corynebacterium aurimucosum	62f
062	C. albicans	62g																																		0.047	0.094	0.5		0.012	0.032	0.032
063	Raoultella ornithinolytica	63b
063	E. faecalis	63c	0,75				1		4			0,125																		1	1			4
064	Enterobacter cloacae	64b	<	<		<	<					<	<		<			<					<		<
064	E. faecium	64c	0,5				4		8			1																		0.5	1			8
065	E. faecium	65a	>				>		>			>																		1	4			4
065	Rothia mucilaginosa	65b
066	E. faecium	66a	>				>		8			>																		>	>			2
066	Kleb. Oxytoca	66c	1	0,5		<	<					<	<		8			<					<		<
066	E. faecalis	66d	0,25				0,5		>			>																		2	0.25			4
066	E. coli	66e		1	0,5	1	0,25	<	0,5				0,03			4		<					<			<
066	C. glabrata	66f																																		0.064	0.016	16		0.38	0.094	1
066	C. albicans	66g																																		0.125	0.125	0.19		0.003	0.047	0.023
067	E. faecalis	67a	0,5				1		>			>																		2	0.25			4
067	Enterobacter cloacae	67b	2	1		0,125	0,125					0,125	<		2			0,5					0,25		64
067	Strep. anginosus	67c			<	<			<				<	<													<	<	<	<	<	<	<	<	<
067	Kleb. Oxytoca	67e	<	4		<	<					<	<		0,5			<					<		<
067	C. albicans	67f																																		0.125	0.125	0.094		0.004	0.008	0.006
068	E. faecalis	68a	0,25				1		>			>																		2	2			2
068	Staph. Epidermidis	68b
068	E. faecium	68c	>				>		16			>																		2	2			4
068	Proteus vulgaris	68e
068	C. albicans	68g																																		0.032	0.064	0.5		0.006	0.125	0.016
069	E. faecalis	69a	0,5				1		2			0,25																		1	0.5			4
069	E. avium	69b	0,25				0,25		1			0,125																		0.5	<			1
069	Actinomyces viscosus	69c
069	Citrobacter youngae	69e
069	Strep. Parasanguinis	69f			<	<			<				<	<													<	<	<	<	<	<	<	<	<
070	E. coli	70b		1	1	0,06	0,25	<	0,5				<			32		<					<			<
070	Enterobacter cloacae	70d	<	<		<	<					<	<		<			<					<		<
070	E. faecalis	70f	0,5				1		2			0,25																		2	2			4
071	E. faecium	71a	0,25				1		8			0,125																		2	0.25			2
071	E. coli	71b		0,5	1	<	0,25	0,125	0,25				<			1		<					1			<
071	Kleb. Pneumoniae	71c	<	<		<	<					<	<		<			<					<		<
071	E. gallinarum	71d	0,5				2		2			<																		4	1			2
071	Pseudomonas aeroginosa	71e
072	E. coli	72a		1	2	0,06	0,25	<	0,5				<			2		<					<			<
072	Strep. Constellatus	72b			<	<			<				<	<													<	<	4	4	<	<	<	0.5	<
072	E. faecalis	72f	0,5				0,5		2			>																		2	1			8
072	C. glabrata	72h																																		0.25		<	<	<	<	<
073	Strep. Pneumoniae	73a			<	<			<				<	<													<	<	<	<	<	<	<	<	<
073	Lactobac. Casei	73c
073	Strep. Parasanguinis	73e			<	<			<				<	<													<	<	<	<	<	<	<	<	<
073	C. albicans	73																																		0.016	0.012	<		0.006	0.125	<
074	Raoultella planticola	74a
074	Proteus vulgaris	74a
074	E. coli	74c		<	<	<	<	<	<				<			<		<					<			<
074	Bacteroides uniformis	74G
075	E. faecium	75a	>				>		8			>																		>	16			2
075	Pseudomonas aeroginosa	75c
075	C. albicans	75e																																		<		<	<	<	<	<
075	C. glabrata	75f																																		2		>	8	1	0.125	1.5
076	Strep. Oralis/mitis	76a			<	<			<				<	<													<	<	<	<	<	<	<	<	<
076	Strep. anginosus	76b			<	<			0,5				2	0,125													<	0.125	1	0.25	<	<	<	1	<
076	Raoultella planticola	76c
076	Kleb. Oxytoca	76d	4	4		0,06	0,125					0,125	0,03		32			1					0,25		128
076	Prevotella melaninogenia	76G
077	Staph. Aureus	77a
077	Strep. Parasanguinis	77b			0,25	0,125			0,125				0,06	0,06													<	<	<	<	<	<	<	<	<
077	E. faecalis	77c	0,25				1		0,5			<																		0.5	<			0.25
077	C. albicans	77f																																		<		<	<	<	<	<
077	Prevotella melaninogenia	77iso
078	E. faecalis	78a	0,25				0,5		1			0,25																		2	0.25			1
078	Staph. Aureus	78b
078	E. faecium	78c	1				8		8			0,25																		0.25	0.25			2
078	E. avium	78iso	<				<		<			<																		<	<			<
079	E. faecalis	79b	<				<		<			<																		<	<			<
079	Strep. Salivarus ssp. Salivarus	79d			<	<			<				<	<													<	<	<	<	<	<	<	<	<
079	Kleb. Oxytoca	79g	<	<		<	<					<	<		<			<					<		<
079	C. albicans	79h																																		<		<	<	<	<	<
079	Ralstonia insidiosa	79A
079	Bacteroides vulgatus	79G
080	E. faecalis	80a	0,5				0,25		2			<																		2	<			0.5
080	Enterobacter cloacae	80b	<	<		<	<					<	<		<			<					<		<
080	Strep. anginosus	80c			<	<			<				<	<													<	<	<	<	<	<	<	<	<
080	C. glabrata	80																																		1.5		3	>	1	0.064	<
081	Citrobacter freundii	81a
081	Strep. Parasanguinis	81b			<	<			<				<	<													<	<	<	<	<	<	<	<	<
081	Strep. Sanguinis	81c			<	<			<				<	<													<	<	<	<	<	<	<	<	<
081	Enterobacter cloacae	81d	<	<		<	<					<	<		<			<					<		<
081	Prevotella melaninogenia	81G
082	E. faecalis	82a	<				<		<			<																		<	<			<
082	Enterobacter cloacae	82b	<	<		<	<					<	<		<			<					<		<
082	C. albicans	82d																																		<		<	<	<	<	<
082	Kleb. Oxytoca	82e	>	32		>	>					0,125	<		8			>					<		<
083	Strep. Parasanguinis	83a			<	<			<				<	<													<	<	<	<	<	<	<	<	<
083	Corynebacterium striatum	83b
083	Veillonella parvula	83iso
084	E. gallinarum	84a	0,25				1		2			<																		8	0.5			2
084	Corynebacterium bovis	84b
084	E. casseliflavus	84c	0,25				0,125		1			<																		8	0.5			4
084	Staph. Epidermidis	84e
084	C. dubliniensis	84f																																		<		<	<	<	<	<
084	Veillonella parvula	84iso
085	E. faecalis	85a	0,5				0,5		2			0,25																		2	<			4
085	Raoultella planticola	85b
085	Strep. Salivarus ssp. Salivarus	85c			<	<			<				<	<													<	<	<	<	<	<	<	<	<
085	Crypt. Huminocola	85d
085	C. albicans	85d																																		<		<	<	<	<	<
085	Staph. Saprophyticus	85G
086	E. faecalis	86a	1				2		8			>																		1	0.5			2
086	E. faecium	86b	0,5				2		8			0,125																		0.5	<			1
086	C. albicans	86d																																		<		<	<	<	<	<
086	Prevotella oris	86G
087	E. coli	87a		>	>	>	0,25	<	>				>			>		64					0,25			0.25
087	E. faecium	87c	0,25				0,5		8			0,125																		0.5	<			2
087	C. albicans	87d																																		0.004		>	>	1	<	>
088	E. faecium	88a	1				4		8			0,125																		0.5	1			2
088	E. faecalis	88b	0,25				0,5		1			0,125																		1	<			1
088	Kleb. Oxytoca	88c	16	4		0,25	0,125					0,125	0,06		16			0,5					0,5		8
088	C. kefyr	88e																																		0.125		0.25	0.016	0.012	<	0.125
088	Cronobacter sakazakii	88G
089	E. avium	89a	<				<		<			<																		<	<			<
089	E. coli	89b		1	2	<	0,125	<	1				<			1		0,25					1			0.5
089	E. faecalis	89c	<				0,25		1			0,125																		1	<			1
089	Kleb. Pneumoniae	89d	2	4		0,06	0,125					0,125	0,03		4			1					0,5		4
089	E. casseliflavus	89g	0,25				0,25		2			<																		2	0.5			0.5
089	Bacteroides vulgatus	89G
090	E. faecium	90a	>				>		16			>																		1	0.5			2
090	Staph. Haemolyticus	90c
091	Proteus mirabilis	91a
091	Proteus vulgaris	91c
091	E. faecalis	91d	0,5				0,5		0,25			0,125																		2	0.25			2
091	C. albicans	91e																																		0.094		192	0.5	0.19	0.004	8
092	E. faecium	92a	>				>		8			>																		1	0.25			2
092	E. coli	92b		2	4	<	0,125	<	1				<			2		0,25					0,5			0.25
093	E. coli	93a		<	<	<	<	<	<				<			<		<					<			<
093	E. faecalis	93d	0,25				0,5		8			0,25																		2	<			2
093	Bacteroides fragilis	93G
094	Strep. Oralis/mitis	94a			<	<			<				<	<													<	<	<	<	<	<	<	<	<
094	Enterobacter aerogens	94b	<	<		<	<					<	0,06		8			1					1		8
094	Strep. anginosus	94c			<	<			<				<	<													<	<	<	<	<	<	<	<	<
094	E. faecium	94e	<				0,25		8			0,25																		0.5	0.25			4
094	C. albicans	94f																																		<		<	<	<	<	<
094	Veillonella parvula	94A
095	Strep. Oralis/mitis	95a			<	<			<				<	<													<	<	0.5	<	<	2	<	<	<
095	E. avium	95b	<				<		<			<																		<	<			<
095	Citrobacter koseri	95c
095	E. casseliflavus	95d	<				0,125		2			<																		2	0.5			0.25
095	E. faecalis	95e	0,5				0,5		1			0,25																		4	0.25			2
096	E. faecium	96a	2				>		8			0,25																		1	0.25			4
096	E. faecalis	96c	0,5				0,5		2			0,5																		4	0.25			4
096	Vibrio algilolyticus	96d
096	C. tropicalis	96g																																		<		<	<	<	<	<
096	C. norvegen/incons	96h																																		>		>	>	>	>	>
096	C. albicans	96i																																		<		<	<	<	<	<
097	E. faecium	97a	>				>		8			>																		1	<			2
097	Strep. Oralis/mitis	97b			<	<			<				<	<													<	<	<	<	<	<	<	<	<
097	C. albicans	97d																																		0.5		0.38	0.064	0.012	0.125	0.125
098	E. faecalis	98a	1				1		0,5			<																		2	0.25			4
098	E. coli	98b		<	<	<	<	<	<				<			<		<					<			<
098	Haemophilus parainfluenzae	98c
098	Hafnia alvei	98d
098	Strep. anginosus	98f			<	<			<				<	<													<	<	<	<	<	<	<	<	<
098	C. albicans	98h																																		<		<	<	<	<	<
099	E. faecium	99a	>				>		>			>																		0.25	0.25			1
099	C. krusei	99f																																		2		>	0.5	0.5	0.75	0.25
099	C. albicans	99g																																		<		<	<	<	<	<
100	E. faecalis	100b	<				<		<			<																		<	<			<
100	E. faecium	100d	1				8		8			0,25																		1	0.5			2
100	Propionibacterium avidum	100G
101	Enterobacter cloacae	101a	4	2		0,25	0,25					0,06	0,06		8			1					0,5		8
101	E. faecalis	101b	0,5				0,5		1			0,25																		1	<			4
101	E. faecium	101d	2				>		8			<																		0.5	0.5			4
101	Bifidobacterium spp.	101G
101	C. albicans	101f																																		<		<	<	<	<	<
102	Staph. Epidermidis	102a
102	E. faecium	102b	>				>		>			>																		1	0.25			2
102	C. albicans	102e																																		<		<	<	<	<	<
103	E. faecium	103a	>				>		>			>																		1	0.25			2
104	E. faecalis	104a	0,25				0,5		1			<																		0.25	<			4
104	Enterobacter cloacae	104b	>	2		0,125	2					0,06	0,016		>			1					2		>
104	Haemophilus parainfluenzae	104c
104	Serratia marcescens	104d
104	C. tropicalis	104f																																		<		<	<	<	<	<
105	Salmonella group	105a
105	E. casseliflavus	105e	0,25				0,5		0,5			<																		8	0.25			2
105	Lactobac. Rhamnosus	105f
105	Veillonella parvula	105A
105	C. albicans	105																																		<		0.25	0.125	1	0.75	0.047
106	E. faecalis	106b	0,5				1		2			0,25																		1	1			4
106	Kleb. Oxytoca	106d	>	>		1	0,125					>	0,03		32			1					0,06		8
106	C. kefyr	106g																																		0.38		0.38	0.016	0.023	<	0.125
106	C. albicans	106h																																		<		<	<	<	<	<
107	Strep. Constellatus	107a			<	<			1				0,125	0,25													<	<	<	<	<	<	<	<	<
107	E. coli	107b		<	<	<	<	<	<				<			<		<					<			<
107	E. faecalis	107d	0,5				0,5		0,5			0,125																		1	0.25			2
108	E. coli	108a		2	1	0,06	0,125	<	2				<			2		0,5					0,5			0.125
108	E. faecalis	108b	0,75				0,5		1			0,125																		2	0.25			4
108	Staph. Epidermidis	108e
109	E. coli	109a		<	<	<	<	<	<				<			<		<					<			<
109	E. faecalis	109b	0,25				0,25		128			>																		1	0.064			1
109	C. glabrata	109e																																		0.5		>	>	1	0.38	1.5
110	Kleb. Pneumoniae	110a	<	<		<	<					<	<		<			<					<		>
110	E. faecium	110b	>				>		32			>																		1	0.25			2
110	E. coli	110d		1	1	0,06	<	0,125	1				<			2		0,5					<			<
110	Pseudomonas aeroginosa	110g
110	Bacteroides fragilis	110G
111	Proteus mirabilis	111a
111	E. coli	111b		2	2	<	0,125	<	2				<			2		0,25					0,25			0.125
111	E. faecium	111c	1				2		24			1																		0.5	0.25			1
112	E. faecalis	112b	0,75				1		4			1																		2	0.5			2
112	Kleb. Pneumoniae	112d	32	0,5		0,06	0,25					<	0,5		2			<					4		1
112	E. coli	112e		2	2	0,06	0,25	<	1				<			2		0.5					0.25			0.25
113	Staph. Epidermidis	113a
113	Abiotrophia defectiva	113b
113	Acinetobacter baumanii complex	113c
113	Prevotella melaninogenia	113G
114	E. faecium	114b	1				4		32			0,25																		6	1			1
114	E.coli	114d		4	2	<	0,125	<	1				0,25			>		0.5					0.25			0.5
114	Strep. anginosus	114d
114	Rhizobium radiobacter	114G
114	C. tropicalis	114																																		<		<	<	<	<	<
115	E. coli	115a		>	>	>	0,125	<	0,125				>			>		0.5					<			0.125
115	Hafnia alvei	115b
115	E. faecalis	115c	0,75				0,5		1,5			0,125																		4	0.25			4
115	C. albicans	115e																																		<		<	<	<	<	<
116	E. coli	116b		>	>	0,25	>	<	>				>			>		64					0.5			0.25
116	E. faecium	116d	3				>		16			0,125																		2	0.25			2
116	E. faecalis	116e	1				0,5		2			0,125																		4	0.25			4
116	Saccharomyces cerevisiae	116f
116	C. albicans	116g																																		0.19		<	0.125	<	0.032	0.032
117	E. faecalis	117a	0,5				0,5		32			0,25																		4	0.25			2
117	Proteus vulgaris	117b
117	Kleb. Pneumoniae	117d	<	<		<	<					<	<		<			<					<		<
117	Bacteroides thetaiotaomicron	117G
118	E. coli	118a		>	8	0,06	0,125	<	1				>			>		1					0.5			0.25
118	E. faecalis	118c	0,5				0,25		1			0,125																		4	0.25			2
118	E. avium	118d	<				<		<			<																		<	<			<
118	C. albicans	118e																																		<		<	<	<	<	<
118	Bacteroides fragilis	118G
119	Enterobacter cloacae	119a	32	1		0,25	1					0,06	0,016		64			1					2		8
119	Strep. Oralis/mitis	119b			>	>			<				0,125	0,06													4	0.25	0.03	4	0.5	24	1	0.5	0.25
119	Citrobacter brakii	119c
119	E. faecalis	119d	1				0,5		1			0,125																		2	0.25			2
119	E. faecium	119e	1				2		16			0,25																		0.5	0.5			4
120	Citrobacter brakii	120a
120	E. faecalis	120b	0,5				1		0,5			<																		4	0.5			4
120	E. faecium	120e	1				4		8			0,25																		1	0.5			1
120	C. albicans	120f																																		<		<	<	<	<	<
120	Veillonella parvula	120A
121	E. faecalis	121a	0,25				0,5		1			<																		2	0.25			4
121	Citrobacter youngae	121c
121	E. faecium	121d	1				16		8			0,125																		2	1			2
121	E. durans	121e	0,5				1		8			0,25																		1	0.25			2
121	C. glabrata	121f																																		1		16	6	1	0.003	2
122	Strep. Gallolyticus ssp. Gallolyticus	122a			<	0,06			<				0,5	0,125													0.06	0.125	0.125	0.125	<	<	<	0.25	<
122	E. coli	122b		8	4	0,06	0,125	<	2				0,03			32		0,5					0,25			0.25
122	Morganella morganii	122e
122	Prevotella melaninogenia	122G
123	E. coli	123a		1	2	0,06	0,125	<	1				0,25			2		2					0,125			0.125
123	Mycobacterium avium	123c
123	Kleb. Oxytoca	123e	<	<		<	<					<	<		<			<					<		<
123	E. durans	123f	1				1		8			0,125																		2	0.5			2
123	Strep. anginosus	123g			>	>			0,125				0,125	0,03													>	>	96	8	1	24	4	0.5	1
123	Clostridium perfringens	123A
124	E. avium	124a	<				<		<			>																		<	<			<
125	Strep. anginosus	125a			<	<			<				0,125	kl													64	8	12	8	2	<	<	0.5	<
125	Hafnia alvei	125c
125	C. albicans	125e																																		<		<	<	<	<	<
126	E. faecalis	126a	1				1		>			>																		4	1			4
126	E. faecium	126b	0,5				8		8			<																		1	0.5			2
126	Staph. Haemolyticus	126d
126	C. albicans	126f																																		<		>	>	>	>	>
126	C. glabrata	126g																																		0.19		0.25	>	0.016	<	0.19
127	Proteus mirabilis	127a
127	E. coli	127c		1	1	<	0,125	<	1				<			1		0,25					0,25			0.25
127	Strep. anginosus	127e			>	>			0,25				0,125	0,03													12	4	16	8	2	32	12	1	1
127	Bacteroides vulgatus	127G
128	Staph. Aureus	128a
128	Enterobacter amnigenus	128b	<	<		<	<					<	<		<			<					<		<
128	Kleb. Oxytoca	128c	<	<		<	<					<	<		<			<					<		<
128	E. faecium	128d	1				8		8			0,25																		2	2			8
128	Strep. anginosus	128e			>	1			<				<	kl													<	<	<	<	<	<	<	<	<
128	C. albicans	128
129	E. faecalis	129b	0,25				0,125		0,25			<																		0.5	0.25			1
129	Citrobacter freundii	129c
130	E. faecalis	130a	0,5				0,5		0,5			0,25																		4	<			4
130	Enterobacter cloacae	130b	32	2		0,125	4					0,04	0,06		32			1					1		>
130	E. faecium	130c	2				4		24			1																		2	1			8
130	Prevotella melaninogenia	130G
130	C. albicans	130
131	Kleb. Oxytoca	131a	32	4		0,06	0,5					0,25	0,06		64			0,5					0,25		8
131	E. faecium	131b	1				8		8			0,25																		1	1			2
131	Strep. anginosus	131c			<	<			0,25				0,125	0,06													>	>	>	8	0.5	<	<	1	0.25
131	E. coli	131e		<	0,25	0,06	<	<	1				0,5			1		0,5					0,25			0.25
131	Cronobacter sakazakii	131G
132	E. coli	132a		1	1	<	0,25	0,125	1				<			1		0,25					0,25			0.25
132	Kleb. Oxytoca	132b	0,5	>		>	>					8	1		<			>					>		<
132	Strep. anginosus	132e			0,25	0,03			2				0,5	0,25													<	<	2	0.5	<	<	<	1	0.125
132	E. faecalis	132f	0,5				0,5		0,5			<																		4	<			2
132	Prevotella buccae	132G
133	Strep. anginosus	133a			>	>			0,125				0,06	0,06													>	0.5	16	16	2	>	1	0.5	0.5
133	E. coli	133c		2	2	0,06	0,125	<	2				<			1		0,5					0,25			0.125
133	E. gallinarum	133d	0,25				0,25		0,5			<																		4	0.25			1
133	Aeromonas hydrophila	133f
133	E. casseliflavus	133g	0,5				0,5		1			<																		4	0.5			1
134	E. coli	134a		>	8	0,06	0,125	0,125	2				<			>		1					0,5			0.25
134	Kleb. Pneumoniae	134b	4	0,5		<	0,125					0,125	0,03		>			0,125					0,5		32
134	Pediococcus pentosacens	134g
134	C. albicans	134
135	E. avium	135a	1				1		0,5			<																		0.125	<			0.25
135	E. coli	135c		2	2	0,125	0,125	<	2				<			2		0,5					0,5			0.25
135	E. faecium	135d	<				<		<			<																		1	0.5			2
135	E. gallinarum	135e	2				2		2			<																		8	0.5			0.5
135	C. albicans	135
136	Proteus vulgaris	136a
136	E. coli	136b		2	4	0,06	0,125	0,125	1				0,06			1		0,5					0,5			0.125
136	Enterobacter cloacae	136d	>	16		>	1					>	4		>			96					1		64
136	Strep. Gallolyticus ssp. Gallolyticus	136f			>	>			0,25				1	0,03													0.06	0.5	0.125	0.5	<	24	4	0.5	1
136	Bacteroides thetaiotaomicron	136G
137	Strep. Gallolyticus ssp. Gallolyticus	137a			<	<			1				0,5	0,25													<	<	<	0.5	0.25	0.06	0.06	<	0.125
137	E. faecalis	137b	1				2		2			0,5																		0.5	0.5			2
137	E. coli	137d		>	0,5	0,06	0,125	<	2				<			>		0,25					0,125			<
137	Bifidobacterium spp.	137G
138	E. durans	138a	1				4		8			<																		1	0.25			8
138	Staph. Epidermidis	138b
138	E. coli	138d		16	>	>	0,25	0,125	2				>			>		32					0,5			0.125
138	C. albicans	138g
138	E. faecalis	138h	<				2		4			<																		4	0.25			4
139	Neisseria subflava	139a
139	E. faecium	139b	4				>		48			0,125																		0.5	0.5			4
139	E. faecalis	139c	1,5				0,25		8			<																		1	0.5			4
139	Staph. Haemolyticus	139f
140	Kleb. Pneumoniae	140a	4	4		0,06	0,125					0,25	0,03		32			<					0,5		8
140	Strep. anginosus	140b			>	>			<				<	0,125													<	<	<	<	<	<	<	<	<
140	E. faecalis	140c	1				0,5		1			0,125																		2	0.25			4
140	Hafnia alvei	140d
140	Prevotella denticola	140G
141	Staph. Aureus	141b
141	Bifidobacterium spp.	141c
141	E. coli	141d		4	8	0,25	0,125	0,125	1				1			2		1					0,25			0.25
141	E. faecium	141e	1				4		8			0,125																		0.5	1			8
141	E. faecalis	141f	0,5				0,25		16			0,125																		0.5	0.125			2
142	Staph. Haemolyticus	142b
142	E. faecium	142f	2				>		16			0,125																		2	0.5			2
143	E. faecalis	143a	1				1		>			>																		1	0.5			4
143	Strep. Oralis/mitis	143b			<	<			32				0,125	0,25													<	<	<	<	<	<	<	<	<
143	C. albicans	143
144	Proteus mirabilis	144a
144	E. coli	144c		4	4	0,125	0,125	<	1				0,25			1		1					0,5			0.25
144	Pseudomonas aeroginosa	144d
144	E. avium	144e	<				<		<			<																		<	<			<
144	Bacteroides fragilis	144G
144	C. albicans	144
145	E. faecalis	145a	0,5				0,25		1			0,125																		1	0.5			2
145	Strep. Parasanguinis	145b			<	<			1				0,125	0,125													<	<	<	<	<	<	<	<	<
145	Rothia mucilaginosa	145c
145	Strep. Oralis/mitis	145d			256	1,5			0,5				0,25	0,25													<	<	<	<	<	<	0.125	1	1
146	Enterobacter cloacae	146a	8	1,5		0,5	1					0,125	0,06		8			1					1		>
146	E. faecalis	146b	1				0,5		1			0,125																		8	0.5			4
146	Strep. Salivarus ssp. Salivarus	146f			16	2			8				2	0,5													1	8	0.5	0.25	<	0.03	0.094	1.5	4
146	C. albicans	146
147	E. faecalis	147a	1				1		16			0,125																		1	0.25			4
147	E. faecium	147b	>				>		>			0,5																		1	0.5			2
147	Strep. Parasanguinis	147c			<	<			2				0,25	0,125													<	<	<	0.5	4	>	>	0.5	1
147	C. albicans	147
148	C. glabrata	148h																																		6		12		1.5	0.38	8
148	C. parapsilosis																																			3		4		0.5	0.38	12
148	E. coli	148a		4	1	0,06	0,25	<	2				>			64		0,25					0,5			0.25
148	E. faecalis	148b	0,5				0,5		1,5			0,125																		4	0.25			2
148	Kleb. Pneumoniae	148e	8	2		0,06	0,125					0,25	0,03		>			0,5					1		64
148	Staph. Haemolyticus	148g
148	C. albicans	148h
149	C. kefyr	149																																		24		4		0.25	0.25	0.25
149	E. coli	149a		64	8	4	0,25	<	1				>			>		16					0,5			0.5
149	E. faecium	149c	>				>		>			>																		1	<			2
150	Pseudomonas aeroginosa	150c
150	E. coli	150d		1	1	0,06	0,25	<	1				<			1		0,25					0,5			0.25
150	Enterobacter cloacae	150e	>	32		>	0,5					0,5	0,125		>			>					2		64
151	Kleb. Oxytoca	151a	2	0,5		<	<					0,125	0,03		>			<					0,5		>
151	Enterobacter cloacae	151b	>	32		>	1					1	0,25		>			>					1,5		32
151	Pseudomonas aeroginosa	151c
151	E. faecalis	151e	0,5				0,5		>			16																		1	0.5			4
152	Strep. Oralis/mitis	152a			<	<			1				0,125	0,25													<	<	<	<	<	<	<	<	<
152	E. faecalis	152b	0,5				0,5		8			>																		0.5	0.5			4
152	C. albicans	152d																																		0.5		0.25	0.19	0.016	0.032	0.094
153	Enterobacter aerogens	153a	8	1		0,25	2					0,09	0,03		>			1					1		8
153	Strep. Suis	153d			<	<			<				<	k													<	<	>	4	2	>	>	1	8
154	E. coli	154a		1	2	0,06	0,125	0,25	2				<			2		0,5					0,5			0.25
154	E. faecalis	154b	0,5				0,25		1			<																		1	0.25			4
154	Enterobacter cloacae	154c	32	1		0,25	4					0,06	0,06		>			1					2		>
154	E. gallinarum	154e	0,5				0,25		2			<																		4	0.5			2
155	Citrobacter koseri	155a
155	Morganella morganii	155b
155	E. gallinarum	155f	0,5				0,25		1,5			<																		4	0.5			2
155	E. faecalis	155g	0,5				0,5		1,5			0,25																		4	0.25			4
155	Parabacteroides distasonis	155A
156	Kleb. Oxytoca	156a	>	<		<	<					<	<		<			<					<		<
156	Strep. anginosus	156d			<	<			<				<	<													<	<	<	<	<	<	<	<	<
157	Proteus vulgaris	157b
157	Pseudomonas aeroginosa	157c
157	C. albicans	157f
157	Bacteroides thetaiotaomicron	157G
158	Staph. Epidermidis	158a
158	Bacillus pumilus	158b
158	E. avium	158f	4				0.5		0.125			<																		0.38	0.047			0.5
158	C. albicans	158e																																		0.5		0.125	0.032	0.023	0.004	0.064
159	C. glabrata	159g																																		4		4		0.75	0.19	1
159	Enterobacter cloacae	159a	>	1		0,125	1					0,125	0,06		>			1					2		32
159	Strep. anginosus	159d			0,125	0,06			4				1	0,5													0.03	0.25	1	0.5	<	0.03	0.03	1.5	0.125
159	E. coli	159c		8	4	0.06	0.25	<	1				0,03			64		0,5					0,25			0.25
159	Strep. Equi ssp. Zooepidemicus	159e			<	<			<				<	<													<	<	<	<	<	<	<	<	<
159	C. albicans	159f
160	Citrobacter brakii	160a
160	E. coli	160c		2	8	0.125	0.25	0.125	2				<			4		1					0,5			0.25
160	Lactococcus garvieae	160d
160	E. faecalis	160e	0.5				1		2			0,25																		2	0.5			4
161	C. glabrata	161																																		1		12		0.19	0.25	1
161	Hafnia alvei	161b
161	E. faecium	161c	>				>		8			0,125																		1	0.5			1
161	E. coli	161d		2	4	0.06	0.25	0.125	2				0,03			2		1					0,125			0.25
161	Strep. anginosus	161f			<	<			<				<	<													<	<	<	<	<	<	<	<	<
161	E. faecalis	161g	0.5				1		1			0,25																		1	0.5			4
162	Proteus mirabilis	162a
162	E. coli	162c		2	8	0.06	0.25	<	2				<			2		0,5					0,5			0.5
162	Strep. anginosus	162d			<	<			<				<	<													<	<	<	<	<	<	<	<	<
162	E. avium	162e	0.125				0.25		0.25			<																		0.5	<			0.25
162	C. albicans	162f
163	C. glabrata	163g																																		2		64		2	0.5	4
163	Citrobacter brakii	163a
163	E. faecalis	163b	0.5				0.25		1			0,25																		1	0.25			2
163	Pseudomonas aeroginosa	163d
163	C. albicans	163f
164	C. glabrata	164e																																		0.125	0.008	8		4	0.38	2
164	E. avium	164a	0.25				<		0.25			<																		0.5	<			1
164	E. faecalis	164d	0.5				0.25		2			0,125																		2	0.5			2
164	C. albicans	164f
164	Bacteroides stercoris	164G
165	E. faecalis	165a	0.5				0.25		2			0,125																		4	0.25			2
165	E. coli	165b		8	16	0.125	0.125	0.125	2				0,125			8		2					1			0.5
165	Kleb. Oxytoca	165c	8	2		0.06	0.5					0,25	0,06		32			0,5					0,5		16
165	C. albicans	165e																																		0.023		0.38	1	0.006	<	0.032
166	Morganella morganii	166a
166	E. faecalis	166b	0.5				0.5		1			0,5																		1	0.25			2
166	C. albicans	166e																																		0.25		0.25	>	0.016	<	0.19
166	Bacteroides vulgatus	166G
167	Neisseria subflava	167b
167	E. coli	167c
167	Strep. Infantarius ssp. Coli	167d			16	<			1				4	0,5													0.125	0.25	0.25	0.25	<	0.06	<	1	0.125
167	E. faecalis	167e	1				0.5		2			1																		4	0.5			4
168	E. faecalis	168a	0.75				0.5		1			0.25																		2	0.25			4
168	Pseudomonas aeroginosa	168b
168	E. casseliflavus	168d	0.5				0.5		2			<																		4	0.5			2
168	Gemella sanguinis	168G
169	E. coli	169a		4	8	0.06	0.125	0.125	2				0.25			2		1					0,5			0.06
169	E. avium	169b	0.25				0.5		24			<																		1.5	0.25			1
169	Kleb. Oxytoca	169d	8	2		0.06	0.125					0.125	0.03		32			0.5					0,5		32
169	E. casseliflavus	169e	0.25				0.25		1			<																		2	0.25			2
170	C. colliculosa	170e																																		3	0.064	128		2	0.5	4
170	E. faecium	170a	>				>		8			>																		0.5	0.125			1
170	C. albicans	170d
171	Enterobacter cloacae	171a	8	1		0,25	2					0,06	0,03		>			2					4		16
171	Strep. Salivarius ssp. Salivarius	171b			<	<			4				2	0,5													0.25	0.25	0.25	0.5	0.125	0.06	0.06	1	16
171	Kleb. Oxytoca	171c	0,5	4		<	0,25					0,25	0,06		0,5			0,25					0,5		16
171	E. faecalis	171e	0,5				0,5		48			>																		2	0.5			2
172	C. glabrata	172f																																		1	0.125	12		0.25	0.38	6
172	E. faecalis	172a	0,5				0,5		2			0,25																		1	0.5			2
172	E. coli	172c		>	>	>	0,125	<	2				0,06			>		8					0,5			0.25
172	C. albicans	172e
173	Enterobacter cloacae	173a
173	E. faecium	173c	1				0,5		>			>																		0.5	<			2
173	C. albicans	173																																		0.125		0.75	0.032	0.012	<	0.094
174	Lactobacillus rhamnosus	174b
174	Lactobacillus plantarum	174c
174	E. coli	174d		1	2	<	0,25	0,125	2				<			1		0,5					0,5			0.25
174	C. albicans	174g
174	Bacteroides vulgatus	174G
175	E. coli	175a		16	>	>	0,25	0,125	4				>			>		8					0,5			0.25
175	E. faecalis	175c	0,75				0,75		1			0,125																		1	0.5			4
175	Strep. anginosus	175d			<	<			<				<	<													<	<	<	<	<	<	<	<	<
176	E. faecium	176a	>				>		16			>																		0.5	0.25			1
176	Strep. Parasanguinis	176b			<	<			<				<	<													<	<	<	<	<	<	<	<	<
177	Strep. anginosus	177c			<	<			<				<	<													<	<	<	<	<	<	<	<	<
178	C. guilliermondi	178																																		0.5	1	0.75		0.023	1	0.125
178	Morganella morganii	178b
178	E. faecalis	178e	1				0,5		24			0,125																		2	0.5			4
179	Enterobacter cloacae	179a
179	E. faecalis	179b	1				0,5		1			<																		1	0.5			4
180	Strep. anginosus	180b			<	<			<				<	<													<	<	<	<	<	<	<	<	<
180	E. faecalis	180c	1				1		2			0,25																		4	<			4
180	Pseudomonas aeroginosa	180d
180	C. albicans	180g
181	E. coli	181a		2	4	0,06	0,25	0,125	2				<			2		1					1			0.25
182	C. albicans	182																																		2		32		0.25	0.125	4
182	Enterobacter cloacae	182a
182	E. faecalis	182c	0,25				0,25		>			>																		1	0.25			2
183	E. coli	183a		4	2	0,06	0,25	0,125	1				<			64		0,5					0,5			0.5
183	E. faecalis	183c
183	Actinomyces odontolyticus	183d
184	Citrobacter freundii	184a
184	Kleb. Oxytoca	184b	32	2		<	0,125					0,25	0,03		>			<					0,5		32
184	E. faecalis	184c	0,5				0,5		48			>																		2	1			4
185	Kleb. Pneumoniae	185b
185	E. coli	185c		2	4	0,06	0,125	0,03	1,5				0,125			4		0,25					1,5			0.5
185	E. faecalis	185d	0,25				0,5		>			>																		0.5	0.25			4
185	C. albicans	185e	1				1		8			0,125																		1	0.5			4
186	C. colliculosa	186	0,5				0,25		0,5			0,125																		0.5	0.25			8		2	0.19	>		>	0.5	>
186	C. glabrata	186	2				8		8			>																		1	1			1		4	0.125	12		>	0.5	>
186	Proteus vulgaris	186a
186	E. faecalis	186b	1				1		8			0,125																		1	0.5			4
186	E. coli	186c		1	8	0,06	0,125	<	0,5				0,06			2		0,5					1			0.25
187	Kleb. Oxytoca	187a
187	E. faecalis	187b	0,5				1		2			0,19																		2	0.125			3
187	Enterobacter cloacae	187c
188	E. faecalis	188a	0,5				1		4			0,5																		1	0.5			2
188	Hafnia alvei	188c
188	C. albicans	188
189	Proteus mirabilis	189a
189	E. coli	189c		4	2	0,06	0,25	0,125	2				<			4		0,5					0,5			0.25
189	Strep. anginosus	189b			0,25	<			2				0,125	0,25													<	<	0.5	0.125	<	<	<	0.5	<
189	E. faecalis	189e	0,5				0,5		1,5			0,125																		2	0.5			4
189	Bacteroides ovatus	189G
190	Strep. Parasanguinis	190b
190	C. albicans	190a																																		0.125		0.25	0.125	0.016	<	0.125
191	E. faecalis	191a	0,5				0,25		0,5			0,125																		0.5	0.25			8
191	E. coli	191d
191	E. faecium	191e	2				8		8			>																		1	1			1
192	Neisseria subflava	192a
192	Strep. anginosus	192c			<	0,06			0,5				0,5	0,125													0.06	0.25	1	0.25	<	<	<	0.5	<
192	C. albicans	192d																																		0.094		0.38	0.016	0.032	<	0.032
193	Pseudomonas aeroginosa	193a
193	E. faecalis	193b	0,25				0,25		>			>																		1	0.25			4
194	E. gallinarum	194a	2				8		4			0,125																		8	0.5			1
194	E. avium	194b	8				0,25		1			<																		0.5	<			1
194	E. coli	194c		0,5	1,5	l	0,125	<	1,5				0,03			1,5		0,125					1			0.125
194	Bacteroides fragilis	194G
194	C. albicans	194
195	E. coli	195b		0,5	2	<	0,125	<	2				>			16		0,25					1			0.25
195	Strep. anginosus	195d			<	<			2				0,25	0,06													<	<	0.5	0.5	<	0.03	0.03	1	0.125
195	Precotella buccae	195G
196	E. faecalis	196a	0,5				0,5		1			0,125																		4	0.25			2
196	Prevotella melaninogenia	196G
197	E. coli	197a		0,5	4	0,03	0,06	<	1				0,03			16		0,38					0,5			0.125
197	Staph. Epidermidis	197d
197	C. albicans	197
198	E. coli	198d		0,5	2	<	0,25	0,03	1				0,03			>		0,125					1,5			0.125
198	E. gallinarum	198e	1				1		4			0,125																		2	1			2
199	Enterobacter cloacae	199a
199	Citrobacter brakii	199b
199	Lactobacillus plantarum	199d
199	E. faecium	199e	1				4		8			0,25																		1	0.25			4
199	C. albicans	199
200	Strep. anginosus	200b			<	0,06			12				2	1													0.03	<	1	0.5	<	0.03	0.125	2	0.125
200	Kleb. Oxytoca	200c	8	1		0,06	0,125					0,125	0,03		32			<					1		>
200	E. coli	200d		1	4	0,06	0,125	<	2				0,06			2		0,5					1			0.25
200	E. casseliflavus	200e	1				0,5		2			0,125																		8	1			2
200	E. faecalis	200f	1				1		2			0,125																		4	1			4
200	Bacteroides uniformis	200G
200	C. albicans	200
201	E. faecium	201a	>				>		256			0,125																		0.5	0.5			2
201	Hafnia alvei	201e
201	Enterobacter cloacae	201f
201	E. facalis	201g	1				0,5		1			0,25																		2	0.5			4
201	Candida	201
202	C. kefyr	202 iso																																		3	1	0.5		0.064	0.125	0.25
202	E. faecium	202a	>				>		32			>																		1	0.5			2
202	C. albicans	202c																																		0.125		1	0.023	0.016	0.004	0.094
202	E. coli	202d		2	2	0,03	0,125	0,03	2				0,03			1		0,25					0,5			0.125
203	E. faecalis	203b	1				1		2			0,125																		1	0.5			4
204	E. coli	204c		1	4	0,06	0,25	<	2				>			32		0,38					1			0.25
204	E. casseliflavus	204d	0,5				0,125		8			0,25																		1	0.5			4
204	E. faecalis	204e	1				1		2			0,125																		2	0.5			4
204	C. albicans	204g																																		0.25		1	0.032	0.047	<	0.125
204	C. glabrata	204f																																		4	2	>		0.5	0.5	4
205	Citrobacter brakii	205a
205	Strep. anginosus	205d			<	<			k				<	<													<	<	1	1	<	<	<	0.25	<
205	E. faecalis	205e	1				0,5		1			0,25																		4	1			4
205	C. albicans	205																																		0.047		0.38	0.047	0.047	<	0.125
206	E. faecium	206a	>				>		16			>																		>	>			4
206	Staph. Epidermidis	206b
206	C. albicans	206e																																		0.064		0.38	0.023	0.008	<	0.125
207	Enterobacter cloacae	207a
207	E. faecalis	207b	0,5				0,5		1			0,5																		4	2			4
207	E. faecium	207e	>				>		>			>																		1	0.5			4
208	E. casseliflavus	208a	0,25				0,25		1			<																		1	<			1
208	E. faecalis	208b	0,5				1		2			0,25																		0.5	0.5			4
208	Proteus vulgaris	208d1
208	Hafnia alvei	208d2
209	Strep. Oralis/mitis	209a			<	<			<				<	<													<	<	<	<	<	<	<	<	<
209	Staph. Epidermidis	209b
209	E. faecalis	209c	1				1		0,5			<																		2	<			4
209	C. albicans	209
210	Strep. Constellatus	210b			<	<			<				<	<													<	<	<	<	<	<	<	<	<
210	Strep. anginosus	210c			<	0,06			8				1	0,5													0.03	0.25	2	0.5	<	0.06	0.06	1	0.125
210	C. albicans	210																																		0.25		0.25	0.064	0.008	<	0.125
211	E. coli	211a		1	2	0,06	0,125	<	1				0,03			16		0,25					1			0.125
211	E. faecalis	211b	0,5				1		32			>																		0.25	0.5			4
211	Candida	211iso
212	E. faecalis	212a	0,25				1		0,5			<																		2	0.5			4
212	E. coli	212b		2	>	>	0,25	0,125	1				>			>		16					0,5			0.25
212	Lactobacillus acidophilus	212c
213	Haemophilus parainfluenzae	213a
213	Neisseria subflava	213b
213	C. albicans	213d																																		0.25		0.38	0.016	0.016	<	0.094
213	E. faecium	213e	>				>		8			>																		1	0.25			1

## Sheet: Tab 5
Resistenzen (für Grafiken)
	Candida albicans			Non-albicans Candida (NAC)
Amphotericin B	100		Amphotericin B	100
Flucytosine	100		Flucytosine	63
Fluconazole	100		Fluconazole	27
Itraconazole	100		Itraconazole	30
Voriconazole	100		Voriconazole	35
Posaconazole	100		Posaconazole	64
Caspofungin	100		Caspofungin	98
	Empfindlichkeit, zensiert (%)			Empfindlichkeit, zensiert (%)
	Enterococcus faecalis			Enterococcus faecium
AMP/SUL	100		AMP/SUL	0
Imipenem	100		Imipenem	0
Gentamicin (high level)	76		Gentamicin (high-level)	63
Vancomycin	99		Vancomycin	82
Teicoplanin	100		Teicoplanin	84
Linezolid	100		Linezolid	100
	Empfindlichkeit, zensiert (%)			Empfindlichkeit, zensiert (%)
	Escherichia coli			Streptococci
Piperacillin	61		Penicillin G	86
PIP/TAZ	82		Cefuroxime	87
Cefuroxime	81		Cefotaxime	91
Ceftazidim	86		Oxacillin	90
Cefotaxime	81		Ciprofloxacin	90
Meropenem	99		Moxifloxacin	97
Imipenem	99		Gentamicin	94
Ciprofloxacin	78		Vancomycin	80
Gentamicin	93		Teicoplanin	88
Colistin	100		Rifampicin	81
Tigecycline	100		Clindamycin	83
			Daptomycin	83
			Erythromycin	78
			Linezolid	97
	Empfindlichkeit, zensiert (%)			Empfindlichkeit, zensiert (%)

## Sheet: Tab 6
Blutkulturen
154	Kein Wachstum
77	E. faecalis, Staph. aureus
196	Kein Wachstum
95	Kein Wachstum
131	Kein Wachstum
205	Kl. Pneumoniae
186	Kein Wachstum
177	Strep. anginosus, Strep. Constellatus, E. coli
68	Bacteroides fragilis E. faecium
124	E. coli Enterocoocus avium
149	E. coli, Staphylococcus epidermidis, Enterococcus cecorum
84	Kein Wachstum
35	E. faecium (VRE) E. coli
161	Kein Wachstum
66	E. coli Enterococc. gallinarium (R: Vanco)
147	E. coli, Enterococcus faecalis
203	Kl. pneumoniae
87	Kein Wachstum
13	Enterococcus faecalis
75	Staph. epidermidis
209	Strept. parasanguinis, Strept. Vestibularis
88	Kein Wachstum
113	Kein Wachstum
128	Kein Wachstum
54	Kein Wachstum
102	Kein Wachstum
22	Kein Wachstum
210	Kein Wachstum
92	Kein Wachstum
175	E. coli
167	Kein Wachstum
42	Kein Wachstum
117	Kein Wachstum
202	Staph epi, Bacteroides thetaiotaomicron, C. albicans E. faecium
141	E. coli E. faecalis
153	Enterobacter aerogenes
163	Kein Wachstum
96	E. coli (ESBL), Staph. epi
103	Kein Wachstum
130	Enterobacter cloacae
29	Kein Wachstum
76	Raoultella ornithinolytica
93	Kein Wachstum
152	Pseudomonas aeruginosa
62	Kein Wachstum
106	Citrobacter freundii
142	Pseudomonas aerug, E. faecium
143	E. coli, E. faecium
193	E. faecalis
10	Citrobacter freundii
19	Serratia marcescens Klebsiella oxcytoca E. faecium Kl. Pneumoniae
82	Staph. epi, E. faecalis
145	Kein Wachstum
28	E. coli
191	E. coli
118	Kein Wachstum
99	siehe 95
56	Kein Wachstum

## Sheet: Tab 7
Multivariate Analyse
Pat-Nr.	Alter	Geschlecht	Enterokokken	Candida	Malig Sten	LTx	ABx Gabe >48 h	rep ERCP	Stent 90 d	KH 7 d	Cholangitis	Stentokkl	Immunsupp	Tx mit Zytostatika	Diabetes mellitus
1	50	0	1	1	0	0	1	1	1	0	0	1	0	0	0
2	47	1	1	1	0	1	1	0	0	1	1	1	1	0	0
3	63	1	0	0	0	0	0	0	0	0	0	0	0	0	0
4	23	0	0	0	0	0	1	0	1	0	0	0	0	0	0
5	72	0	1	0	1	0	1	0	1	0	0	0	1	1	0
6	58	1	1	0	0	1	0	1	1	0	0	0	1	0	0
7	52	1	1	1	0	1	1	1	1	0	0	0	1	0	0
8	52	0	0	1	1	0	1	1	1	0	0	0	0	1	0
9	60	1	1	0	0	0	0	0	1	0	0	0	0	0	0
10	51	1	1	0	1	0	1	1	0	1	0	0	1	1	0
11	59	0	0	0	0	1	1	0	0	0	0	0	1	0	0
12	70	0	1	0	0	0	1	0	0	0	0	0	1	0	0
13	63	1	0	1	1	0	1	0	0	0	0	0	0	1	0
14	61	1	1	0	0	1	0	0	1	0	0	0	1	0	0
15	34	1	1	1	0	1	1	1	1	0	0	0	1	0	0
16	51	1	1	1	1	0	1	1	0	1	1	0	0	1	0
17	84	1	1	0	0	0	0	0	1	0	0	0	0	0	0
18	54	1	1	1	1	0	1	1	0	1	1	1	0	1	0
19	61	0	1	1	0	1	0	0	0	0	0	0	1	0	0
20	77	1	0	1	0	0	0	0	1	0	0	0	0	0	0
21	72	1	0	0	0	0	0	0	0	0	0	0	0	0	0
22	26	0	1	0	0	1	1	1	1	1	0	1	1	0	0
23	57	1	1	1	1	0	0	0	0	1	0	0	0	1	0
24	81	0	1	1	0	0	1	1	0	0	0	0	0	0	0
25	59	1	1	0	0	0	1	1	1	0	1	0	0	0	0
26	77	1	1	1	1	0	1	1	0	1	0	1	0	1	0
27	73	0	1	0	0	0	0	0	1	0	0	0	0	0	0
28	52	0	1	1	0	0	1	1	1	0	0	1	1	0	0
29	76	1	0	1	0	0	0	0	1	0	0	0	0	0	0
30	74	1	1	1	0	0	0	1	0	0	0	0	0	0	1
31	77	1	1	1	1	0	0	0	0	1	0	0	0	1	0
32	44	1	1	0	0	1	0	0	1	0	0	0	1	0	0
33	68	1	1	1	0	0	1	1	1	0	1	0	0	0	0
34	83	1	1	0	0	0	1	0	1	0	0	0	0	0	0
35	69	1	1	0	0	1	1	1	1	1	1	0	1	0	0
36	61	1	1	1	0	1	1	1	1	1	0	1	1	0	0
37	69	1	1	0	0	0	0	0	0	0	0	0	0	0	0
38	80	0	1	1	1	0	1	1	1	0	1	0	0	1	0
39	62	0	1	1	1	0	1	0	0	1	0	0	0	1	0
40	83	1	1	1	0	0	1	1	1	1	1	0	0	0	0
41	78	0	1	1	1	0	0	1	0	0	0	0	0	1	0
42	60	1	1	1	1	0	1	1	1	0	0	1	0	1	0
43	49	0	0	1	0	0	0	0	0	0	0	0	0	0	0
44	67	0	1	1	1	0	0	0	1	0	0	0	0	1	0
45	78	0	1	1	0	0	1	0	0	0	0	0	0	0	0
46	53	1	1	1	0	0	1	1	0	0	1	0	0	0	0
47	23	1	1	0	0	0	1	0	0	0	1	0	0	0	0
48	46	1	1	0	0	0	1	0	1	0	0	0	0	0	0
49	81	1	1	1	1	0	1	0	0	1	1	0	0	1	0
50	60	1	1	0	0	0	0	0	0	1	0	0	0	0	0
51	84	1	0	1	0	0	0	0	0	1	0	0	0	0	0
52	72	0	1	1	0	0	1	0	1	1	0	0	0	0	0
53	87	0	1	1	1	0	1	1	0	1	1	0	0	1	1
54	76	1	1	1	1	0	0	0	0	1	0	0	0	1	0
55	53	1	1	1	0	0	1	1	0	1	1	1	0	0	0
56	66	0	1	1	1	0	1	1	1	1	1	1	0	1	0
57	7	1	0	0	0	0	1	0	0	1	0	0	0	0	0
58	64	0	1	1	0	0	0	1	0	1	0	1	0	0	0
59	39	0	1	1	0	0	1	1	1	0	0	1	0	0	0
60	80	0	1	1	1	0	0	1	1	0	0	1	0	1	0
61	64	1	1	0	1	0	0	0	0	1	0	0	0	1	0
62	68	1	1	1	0	1	0	0	0	0	0	0	1	0	0
63	66	1	1	0	0	0	1	1	0	1	0	1	0	0	0
64	75	1	1	1	1	0	1	1	0	1	0	0	0	1	0
65	63	1	1	1	0	1	1	1	0	1	1	1	1	0	1
66	80	1	1	1	1	0	0	0	0	0	0	0	0	1	0
67	24	0	1	1	0	0	1	0	0	1	0	0	0	0	0
68	70	0	1	1	1	0	1	0	0	1	0	0	0	1	0
69	63	1	1	0	1	0	1	1	1	1	0	0	0	1	0
70	86	0	1	1	0	0	1	0	0	0	0	0	0	0	1
71	56	1	1	0	0	1	0	0	1	0	0	0	1	0	0
72	56	1	1	0	0	1	0	0	1	0	0	0	1	0	1
73	39	1	1	0	1	0	1	1	0	1	1	0	0	1	0
74	86	0	1	1	0	0	1	0	1	0	0	0	0	0	1
75	76	0	1	1	0	0	0	1	1	0	0	1	0	0	0
76	84	0	1	0	0	0	1	0	0	0	1	0	0	0	0
77	62	1	1	1	1	0	0	0	1	0	0	0	0	1	1
78	64	1	1	1	1	0	0	0	0	1	1	0	0	1	1
79	91	1	0	1	0	0	1	0	0	1	0	0	0	0	0
80	75	1	1	1	0	0	1	0	0	1	0	0	0	0	0
81	64	1	1	1	0	1	1	1	1	0	0	1	1	0	1
82	58	0	1	1	0	1	0	0	0	0	0	0	1	0	0
83	79	0	1	1	0	0	1	0	0	1	0	1	0	0	1
84	75	1	1	1	0	0	1	0	1	1	0	0	0	0	0
85	70	1	1	1	0	0	1	0	0	1	0	1	0	0	0
86	59	0	1	0	0	0	1	0	1	0	0	0	0	0	0
87	63	0	1	1	1	0	1	0	0	1	0	0	1	1	0
88	77	0	1	0	1	0	0	0	0	1	1	0	0	1	1
89	51	1	1	1	1	0	0	0	0	1	0	0	0	1	0
90	80	0	1	1	0	0	1	0	0	0	0	0	0	0	0
91	50	1	1	1	1	0	1	1	1	0	0	0	0	1	0
92	61	1	1	0	0	1	1	0	0	1	0	0	1	0	0
93	50	0	1	0	0	0	1	0	1	0	0	0	0	0	0
94	61	1	1	0	1	0	0	1	0	1	1	1	0	1	0
95	56	1	1	1	1	0	0	0	0	1	0	0	0	1	0
96	60	1	1	1	0	1	1	1	1	0	0	0	1	0	0
97	77	1	1	0	0	0	0	0	0	1	0	0	0	0	0
98	79	1	1	1	1	0	1	1	0	1	0	0	0	1	0
99	60	0	1	1	0	1	0	0	1	0	0	0	0	0	0
100	90	1	1	1	0	0	1	0	0	0	0	0	0	0	0
101	64	0	0	0	0	1	1	0	0	1	0	0	0	0	0
102	80	0	1	1	0	0	1	0	0	0	0	0	0	0	1
103	59	1	1	0	1	0	0	0	0	0	0	0	0	1	0
104	65	0	1	1	1	0	0	0	0	1	0	0	0	1	0
105	27	1	1	1	0	0	0	0	1	0	0	0	0	0	0
106	69	0	0	1	1	0	0	0	0	1	0	0	0	1	0
107	60	0	1	0	1	0	1	0	1	0	0	1	0	1	0
108	55	1	1	1	0	1	1	1	0	1	1	0	1	0	0
109	70	0	0	0	0	0	0	0	0	1	0	0	0	0	1
110	74	1	1	0	0	0	0	0	0	1	0	0	0	0	1
111	90	0	0	1	0	0	1	0	0	0	0	0	0	0	1
112	23	1	1	1	0	0	0	0	1	0	0	0	0	0	0
113	72	1	1	1	0	0	0	0	0	1	1	1	0	0	0
114	72	0	1	1	1	0	1	0	0	1	0	0	0	1	0
115	76	1	1	1	1	0	0	0	0	1	0	0	0	1	0
116	46	1	1	1	0	1	1	0	0	1	0	0	1	0	0
117	63	1	0	1	1	0	0	0	0	1	0	0	0	1	0
118	72	1	1	1	1	0	1	0	0	0	0	0	0	1	0
119	64	1	1	0	0	1	1	0	0	0	0	0	1	0	0
120	63	1	1	1	0	1	1	0	0	0	0	0	1	0	1
